1

2

3 The protozoan *Trichomonas vaginalis* targets bacteria with laterally-acquired

4 NlpC/P60 peptidoglycan hydrolases

5

6

7 Jully Pinheiro<sup>1</sup>, Jacob Biboy<sup>2</sup>, Waldemar Vollmer<sup>2</sup>, Robert P. Hirt<sup>3</sup>, Jeremy R. Keown<sup>1</sup>,

8 Anastasiia Artuyants<sup>1</sup>, David C. Goldstone<sup>1,4</sup>, Augusto Simoes-Barbosa<sup>1\*</sup>

9

10

11

12

13 <sup>1</sup> School of Biological Sciences, University of Auckland, New Zealand

14

15 <sup>2</sup> Centre for Bacterial Cell Biology, Institute for Cell and Molecular Biosciences,

16 Newcastle University, Newcastle upon Tyne, NE2 4AX, UK.

17

18 <sup>3</sup> Institute for Cell and Molecular Biosciences, Newcastle University, Newcastle upon

19 Tyne, NE2 4HH, UK.

20

21 <sup>4</sup> Maurice Wilkins Centre for Molecular Biodiscovery, New Zealand.

22

23 \* Corresponding authors:

24 David Goldstone E-mail: [d.goldstone@auckland.ac.nz](mailto:d.goldstone@auckland.ac.nz)

25 Augusto Simoes-Barbosa E-mail: [a.barbosa@auckland.ac.nz](mailto:a.barbosa@auckland.ac.nz)

## 26        **Abstract**

27            *Trichomonas vaginalis* is a human eukaryotic pathogen and the causative  
28 agent of trichomoniasis, the most prevalent non-viral sexually transmitted infection  
29 worldwide. This extracellular protozoan parasite is intimately associated with the  
30 human vaginal mucosa and microbiota but key aspects of the complex interactions  
31 between the parasite and the vaginal bacteria remain elusive. We report that *T.*  
32 *vaginalis* has acquired, by lateral gene transfer from bacteria, genes encoding  
33 peptidoglycan hydrolases of the NlpC/P60 family. Two of the *T. vaginalis* enzymes  
34 were active against bacterial peptidoglycan, retaining the active site fold and specificity  
35 as DL-endopeptidases. The endogenous NlpC/P60 genes are transcriptionally up  
36 regulated in *T. vaginalis* when in the presence of bacteria. The over-expression of an  
37 exogenous copy produces a remarkable phenotype where the parasite is capable of  
38 competing out bacteria from mixed cultures, consistent with the biochemical activity of  
39 the enzyme *in vitro*. Our study highlights the relevance of the interactions of this  
40 eukaryotic pathogen with bacteria, a poorly understood aspect on the biology of this  
41 important human parasite.

42

## 43        **Author summary**

44            *Trichomonas vaginalis* is a protozoan parasite that causes a very common sexually  
45 transmitted disease known as trichomoniasis. This extracellular parasite resides in the  
46 vagina where it is in close association with the mucosa and the local microbiota. Very  
47 little is known about the nature of the parasite-bacteria interactions. Here, we report  
48 that this parasite had acquired genes from bacteria which retained their original  
49 function producing active enzymes capable of degrading peptidoglycan, a polymer that  
50 is chemically unique to the cell envelope of bacteria. Our results indicate that these  
51 enzymes help the parasite compete out bacteria in mixed cultures. These observations  
52 suggest that these enzymes may be critical for the parasite to establish infection in the

53 vagina, a body site that is densely colonised with bacteria. Our study further highlights  
54 the importance of understanding the interactions between pathogens and microbiota,  
55 as the outcomes of these interactions are increasingly understood to have important  
56 implications on health and disease.

## 57           **Introduction**

58           *Trichomonas vaginalis* is a flagellated protozoan parasite that causes human  
59 trichomoniasis, the most common non-viral sexually transmitted infection worldwide  
60 [1]. Women experience symptoms more often than men and these are mostly  
61 associated to vaginitis and gynecologic complications [2–7]. In addition,  
62 trichomoniasis facilitates the transmission of the Human Immunodeficiency Virus [8].  
63 *T. vaginalis* is an extracellular mucosal parasite that displays an intimate association  
64 with the host tissue and vaginal microbiota. The molecular and cellular basis of the  
65 interactions between *T. vaginalis* and this microbiota are poorly understood but likely  
66 to have a significant impact on the pathobiology of this infection [9–11]. In addition,  
67 trichomoniasis is apparently associated with microbial dysbiosis of the vagina [12].

68           *T. vaginalis* is thought to have evolved from an enteric to a genitourinary  
69 mucosal environment [13] and has been continuously in contact with the mucosa-  
70 associated microbiota. Adaptations to colonize the vaginal mucosa may have impacted  
71 on (or facilitated by) a recent and dramatic genome expansion achieved through a  
72 complex combination of gene and transposable elements duplications and lateral gene  
73 transfers (LGTs). These have contributed to the unexpectedly large genome size  
74 (~170 Mbp) and the extraordinary coding capacity of ~60,000 predicted protein coding  
75 genes [14,15], of which about 30,000 were shown to be transcribed in various tested  
76 growth conditions [16,17]. The co-evolution of *Trichomonas* and bacterial members of  
77 the microbiota may have significantly shaped the genome of this parasite by providing  
78 new functionalities and selective advantages for the parasite to infect human mucosal  
79 surfaces of the urogenital tract [15,18,19].

80           Genome-wide analyses indicate that a considerable number of genes have  
81 been acquired by eukaryotes from prokaryotes by LGT [15,20–22]. Among these are  
82 an increasing number of genes encoding for enzymes that degrade or remodel the  
83 essential bacterial cell wall component, the peptidoglycan (PG) [19,22–26]. Two

84 reports, in particular, have directly demonstrated beneficial implications of these LGT-  
85 acquired genes to the recipient eukaryotic organisms [25,26]. The acquisition of  
86 bacterial PG-degrading enzymes in these two cases has provided a new function to  
87 the eukaryotic host which is controlling bacterial presence or abundance [22,25,26].

88 In the ecological context of *Trichomonas* and commensal bacteria, lateral  
89 acquisition of PG-degrading enzymes could be advantageous to the parasite and it  
90 may explain why *T. vaginalis* infections are preferentially accompanied by certain  
91 species of vaginal bacteria [12]. Indeed, NlpC/P60-like genes are among strong  
92 candidates of LGT among the annotated protein coding genes in the *T. vaginalis*  
93 genome [14,18]. NlpC/P60 proteins were originally described as bacterial cell wall  
94 endopeptidases cleaving the D- $\gamma$ -glutamyl-*meso*-diaminopimelate linkage in PG  
95 [27,28]. NlpC/P60 proteins display the conserved catalytic triad of papain-like thiol  
96 peptidases and may carry additional domains that specify substrate binding, signal  
97 peptides or transmembrane regions for proper subcellular localisation [28].

98 This study aimed to (i) understand the structural diversity and evolutionary  
99 origins of NlpC/P60-like genes identified in the *T. vaginalis* genome, (ii) characterize  
100 the structure-function relationship for a selection of these enzymes by determining their  
101 crystal structures and activities against PG and (iii) examine the potential role of  
102 NlpC/P60 enzymes in parasite-bacteria interactions. To the best of our knowledge, this  
103 is the first study to report the preservation of fully functional LGT-derived PG-degrading  
104 enzymes in a eukaryotic pathogen of the mucosa.

105

## 106 **Results**

### 107 **Primary structural diversity and phylogeny of NlpC genes from** 108 ***Trichomonas vaginalis***

109 A screen for candidate LGT of prokaryotic origins among annotated protein  
110 coding genes in the *T. vaginalis* G3 genome identified the entry TVAG\_119910

111 (XP\_001276902.1) as a strong candidate LGT from bacterial origin [14,18]. This gene  
112 encodes a protein annotated as an endopeptidase member of the Clan CA, family C40,  
113 NlpC/P60 (Pfam entry PF00877 - NlpC/P60 family). A total of nine annotated NlpC/P60  
114 proteins [14] with the domain PF00866 were identified in TrichDB [29] (S1 Table and  
115 Fig 1A and S1 Fig), referred to as TvNlpC/P60. InterProScan analyses of these  
116 proteins also identified a bacterial SH3 domain (domain PF08239, SH3b) in two of the  
117 TvNlpC/P60 proteins (Fig 1A, S1 Table and S1 Fig). In addition, signal peptides were  
118 identified in five TvNlpC/P60 proteins (S1 Table and S1 Fig). These nine proteins are  
119 split in two distinct orthologous groups in TrichDB of four and five sequences, which  
120 we named A (NlpC\_A1-4) and B (NlpC\_B1-5) for simplicity, respectively (S1 Table and  
121 Fig 1). The N-termini of NlpC\_A1-4 and NlpC\_B1-5 are more similar to their respective  
122 orthologous group members and the level of similarity within each group also suggests  
123 that all nine TvNlpC/P60 proteins have functional signal peptides although some are  
124 not recognised as such by current bioinformatics tools (Fig 1B). In contrast all sampled  
125 animal and fungal NlpC/P60 sequences were inferred to possess a signal peptide,  
126 likely explained by the use of restricted, and taxonomically biased, reference  
127 sequences of experimentally confirmed signal peptides to train the signal peptide  
128 identifying software [30](S1 Fig.). Consistent with two orthologous groups, distinct  
129 taxonomic reports for the top 100 BlastP hits against the non-redundant protein  
130 database at the NCBI were obtained with respective members of the two groups used  
131 as query (S2 and S3 Tables), with these hits mainly derived from bacterial members  
132 of the Firmicutes and Actinobacteria. The high alien index (AI) values calculated from  
133 Blast hit lists (AI > 13, see Material and Methods, S1 Table, [31]) for all nine proteins  
134 (AI value range: 13.8-29.6) was consistent with the hypothesis that TvNlpC/P60 genes  
135 were acquired from bacteria by LGT [14,18]. A few proteins from phages infecting  
136 *Clostridium* species were also observed in the BlastP hit list (S2 Table, S3 Table).  
137 More sensitive Delta-Blast searches restricted to non-redundant proteins derived from  
138 eukaryotes led to a small cohort of hits from protists, Fungi and animals (S4 Tables).

139 No hits were observed for the trichomonad *Tritrichomonas foetus* [32], suggesting that  
140 the LGT(s) in *T. vaginalis* were experienced by an ancestor of *T. vaginalis* following  
141 the speciation event that separated the *Tritrichomonas* and *Trichomonas* lineages [13].

142 To investigate the phylogenetic relationship between TvNlpC/P60 proteins and  
143 their homologues, all nine sequences were aligned with a selection of sequences  
144 identified from the various BlastP searches, including searches against annotated  
145 proteins derived from metagenome datasets. Metagenome-derived proteins were of  
146 particular interest as LGT in *T. vaginalis* have been characterized by a bias towards  
147 donor bacterial lineages overrepresented in mammalian gut microbiota [18]. However,  
148 none of the most similar entries to the TvNlpC/P60 proteins annotated in metagenome  
149 datasets, including from the human gut, contributed at resolving the phylogenetic  
150 position of the parasite entries (data not shown), hence these were not included in the  
151 final phylogeny. One gene derived from a ground water metagenome [33], member of  
152 the major bacterial TM6 lineage (accession KKP35888.1), was included as it clustered  
153 within a well-supported clan that included the sequence from the free-living protist  
154 *Acanthamoeba castellanii*, a published candidate LGT for this species [34] (Fig 1).  
155 Additional published NlpC/P60 candidate LGTs in eukaryotes were also considered  
156 including genes from Fungi and mites [35], providing a far more appropriate  
157 phylogenetic framework to investigate the tempo and mode of LGT for all nine  
158 TvNlpC/P60 sequences compared to published analyses, which only considered one  
159 TvNlpC/P60 sequence and bacterial sequences [14,18].

160 A total of 50 NlpC/P60 sequences were aligned and a conservative alignment  
161 restricted to the well-conserved NlpC/P60 domain [28] was subjected to a combination  
162 of complementary phylogenetic analyses (Fig 1C and S5 Table). In contrast to a  
163 relatively recent case of LGT reported in *T. vaginalis*, which does not apparently  
164 encode any functional gene and that was possibly derived from a bacterium of the  
165 urogenital tract of the genus *Peptoniphilus* [15,36], none of the members of the vaginal  
166 microbiota included in the phylogenetic analysis (e.g. *Lactobacillus iners* and

167 *Corynebacterium genitalium*) preferentially clustered with any of the TvNlpC/P60  
168 sequences.

169 All unconstrained maximum likelihood phylogenetic analyses, including amino  
170 acid composition homogenous and composition mixture models (see Material and  
171 Methods section) recovered the members of the two TvNlpC/P60 groups in different  
172 clans (S5 Table), consistent with two distinct LGT events and with these proteins being  
173 members of different orthologous groups (S1 Table). The dissimilar indels  
174 (insert/deletion) profile among the nine aligned NlpC/P60 sequences are also  
175 consistent with two distinct groups of sequences originating from two distinct LGT  
176 events for these genes, which was followed by gene duplication events forming two  
177 distinct protein families of four (clan A) and five (clan B) TvNlpC/P60 proteins (Fig 1C  
178 and S1 Fig). However, weak bootstrap support (values <50%) for a number of stem  
179 branches in the unconstrained phylogenetic analyses did not conclusively support two  
180 independent LGT events (Fig 1C).

181 To further test the robustness of the distinct candidate LGT events into  
182 eukaryotes supported by all unconstrained maximum likelihood phylogenies, including  
183 the potentially two independent LGTs into *T. vaginalis*, a selection of constrained  
184 phylogenetic analyses were performed in combination with tree topology tests (S5  
185 Table). A potential single LGT event into *T. vaginalis*, followed by gene duplications,  
186 for all nine TvNlpC/P60 genes could not be rejected with the protein single rate matrix  
187 based model (LG+G4+I) and the composition mixture model LG4X but was rejected  
188 by the more complex composition mixture model (C20 based model) (S5 Table). In  
189 contrast, all the tested hypotheses in which *T. vaginalis* might have shared the  
190 NlpC/P60 LGT event with one other eukaryotic lineage included in our analyses  
191 (different combinations of *T. vaginalis* sequences constrained to be monophyletic with  
192 a selection of the different distinct eukaryotic sequences) were rejected by all  
193 considered models, in line with the moderate to high (~70-90%) bootstrap values  
194 supporting the scattered distribution of eukaryotic sequences among bacterial



195 homologues in the phylogeny (S5 Table). These analyses are consistent with multiple  
196 independent NlpC/P60 bacteria gene acquisition events among the sampled  
197 eukaryotes.

198

### 199 **The three-dimensional structure of *Trichomonas vaginalis*** 200 **NlpC\_A1 and NlpC\_A2**

201 To investigate the structure and function of the *T. vaginalis* NlpC proteins, we  
202 expressed and purified the proteins and undertook crystallisation experiments towards  
203 determining the structure by X-ray crystallography. Crystals were obtained for  
204 NlpC\_A1 (TVAG\_119910) and NlpC\_A2 (TVAG\_457240) using the sitting drop vapour  
205 diffusion technique. Crystals of NlpC\_A1 diffracted to 1.2 Å resolution and belonged to  
206 the spacegroup P2<sub>1</sub>22<sub>1</sub>. Crystals of NlpC\_A2 diffracted to 2.3 Å and belonged to the  
207 spacegroup P1 (S6 Table).

208 The structure of NlpC\_A1 (PDBid 6BIM/6BIO) was determined by single  
209 isomorphous replacement using SeMet substituted protein. A single molecule is  
210 present in the asymmetric unit and all residues, including three residues that remain  
211 after cleavage of the purification tag, are visible in the electron density map. The  
212 structure of NlpC\_A2 (PDBid: 6BIQ) was subsequently determined by molecular  
213 replacement using the structure of NlpC\_A1 as a search model. Four copies of  
214 NlpC\_A2 are present in the asymmetric unit with residues 11-275 visible in the electron  
215 density maps.

216 NlpC\_A1 and NlpC\_A2 consist of three domains (Fig 2A). The NlpC/P60  
217 domain is located at the C-terminus of the protein and is preceded by two bacterial  
218 SH3 domains. As expected, due to the high sequence identity (90.2% identical, 27  
219 differences, 96.4% similar), both structures are essentially identical (Fig 2B) with an  
220 RMSD on all atoms of 0.491Å (1379 equivalent atoms). For brevity, we will describe  
221 the structure for NlpC\_A1 and highlight differences with NlpC\_A2. The SH3b domains

222 consist of 6  $\beta$ -strands arranged in a beta barrel formation. They are joined by a shared  
223  $\beta$ -strand ( $\beta$ 7) and pack against the NlpC domain in a triangular arrangement. A short  
224 linker of approximately 10 residues joins the second SH3b domain to the NlpC domain.  
225 The NlpC/P60 domain adopts the classical papain-like fold [37] with a central  $\beta$ -sheet  
226 of 5 strands displaying an anti-parallel arrangement. Three helices ( $\alpha$ 2,  $\alpha$ 3, and  $\alpha$ 4)  
227 are packed against one side of the sheet and form the interface to the SH3 domains.  
228 The similarity to other NlpC proteins allows us to assign the active site residues of  
229 Cys179-His234-His246, also present in all 9 *T. vaginalis* NlpC sequences (S1 Fig).  
230 The active-site cysteine is located at the N-terminus of helix  $\alpha$ 3 while the two histidines  
231 are present in strands  $\beta$ 15 and  $\beta$ 16.

232 The active site residues sit in a 'T'-shaped groove that is bounded by strands  
233  $\beta$ 14 and  $\beta$ 15 in the NlpC domain, with the cross of the T formed by the strand  $\beta$ 3 in the  
234 first SH3b domain (Fig 2C). The groove is open and lacking obvious regulatory  
235 elements that are often present in bacterial endogenous peptidases [38]. This is  
236 suggestive of both NlpC\_A1 and NlpC\_A2 being unregulated enzymes capable of  
237 degrading the cell-wall of bacteria.

238 A surface electrostatic calculation [39] demonstrates the active site groove to  
239 carry a slight positive charge with two pronounced areas of strong positive charge. The  
240 first of these is adjacent to the active site cysteine. The second is at the base of a small  
241 pocket at the interface between the NlpC domain and the first SH3b domain bounded  
242 by the residues His195, Tyr43, Trp44, Tyr46, Phe193, Gln184 (Fig 2C).

243 A single residue difference in NlpC\_A2 is located in the vicinity of the active  
244 site where Leu169 in NlpC\_A1 is Trp169 in NlpC\_A2. The tryptophan residue narrows  
245 the groove around the active site cysteine in NlpC\_A2. The remaining sequence  
246 differences are spread across the surface of the protein with no obvious cluster of  
247 residues that might influence function.

248           The presence of multiple SH3b domains, while not unusual for NlpC proteins  
249 [28], is intriguing. NlpC domains are often accompanied by accessory domains that  
250 alter substrate specificity. Previous studies of multi-domain NlpC/P60 proteins have  
251 shown that the accessory domains can exist in a flexible conformation for recognition  
252 of PG [40]. Consequently, small angle X-ray scattering (SAXS) was used to confirm  
253 the arrangement of domains within the crystal. Both NlpC\_A1 and NlpC\_A2 eluted as  
254 a single peak on size-exclusion chromatography and multi-angle light scattering  
255 analysis demonstrating both proteins to be monomeric in solution (S3 Fig).  
256 Comparison of the theoretical scattering from the structural models with SAXS curves  
257 is consistent with the arrangement of domains present in the crystal. This  
258 demonstrates that the NlpC domain and SH3b domains pack in a concerted  
259 arrangement in solution (S2 Fig and S7 Table).

260           To further investigate the role of the SH3b domains in NlpC\_A1 and NlpC\_A2,  
261 we undertook a series of structural similarity searches using the SSM algorithm [41].  
262 These searches failed to identify other structures with a similar global domain  
263 arrangement. Searches using the NlpC domain only identified several other members  
264 of the NlpC superfamily that contain SH3b domains. The NlpC/P60 protein from  
265 *Bacillus cereus* (YkfC; PDBid 3H41) shares the same domain composition with two  
266 SH3b domains at the N-terminus of the protein followed by the C-terminal NlpC  
267 domain. However, alignment of the structures based upon the NlpC domains (258  
268 atoms, RMSD 0.548 Å) reveals an alternative arrangement of the SH3b domains  
269 relative to the NlpC. Additionally, the first SH3b domain of YkfC has a large insertion  
270 consisting of three  $\alpha$ -helices (~40 residues). This results in the active site of YkfC being  
271 more closed (typical of a recycling enzyme [42]) than those of NlpC\_A1 and NlpC\_A2.

272

273           **NlpC\_A1 and NlpC\_A2 degrade peptidoglycan**

274           The structural comparison of NlpC\_A1 and NlpC\_A2 suggests that these  
275 proteins may indeed be involved in the degradation of bacterial PG and, possibly, have  
276 redundant function. To investigate this, we examined the activity of the recombinant  
277 enzymes against PG from *E. coli* as a model substrate. We used an equal mix of PG  
278 from strains MC1061 (laboratory strain, rich in tetrapeptides) and CS703-1  
279 (carboxypeptidase mutant, rich in pentapeptides) [43,44] resulting in a substrate that  
280 contains a mixture of peptide lengths. The PG mix was incubated with NlpC\_A1,  
281 NlpC\_A2 or the corresponding predicted inactive versions in which the catalytic Cys  
282 residue was replaced by either Ala or Ser, followed by digestion with the muramidase  
283 cellosyl and HPLC analysis of the resulting muropeptides (Fig 3 and S3 Fig).

284           The control sample shows the retention times for the peaks corresponding to  
285 the major monomeric (Tetra and Penta) and dimeric (TetraTetra and TetraPenta)  
286 muropeptides (Figs 3A and 3B). In the presence of increasing concentration of  
287 NlpC\_A1 or NlpC\_A2, the Tetra peak decreased and new peaks corresponding to  
288 cleavage products appeared indicating activity against PG (Fig 3A). These new peaks  
289 resulted from the cleavage of the bond between D-isoGlu and *m*-DAP residues (Fig  
290 3C) and classify both NlpC\_A1 and NlpC\_A2 as DL-endopeptidases. At the highest  
291 concentration of the enzymes the dimeric TetraTetra was digested while the  
292 muropeptides with pentapeptides (Penta and TetraPenta) were largely inert. Hence,  
293 we concluded that NlpC\_A1 and NlpC\_A2 are DL-endopeptidases with specificity for  
294 the tetrapeptides in peptidoglycan and with greater activity towards monomeric  
295 muropeptides. Finally, as expected, mutation of the catalytic Cys179 to either Ser or  
296 Ala in NlpC\_A1 and NlpC\_A2 completely abolished their activity towards PG (S3 Fig).

297

298           **The expression of endogenous NlpC\_A1 and NlpC\_A2 genes in**  
299           ***Trichomonas vaginalis***

300 The structure and the activity assays of NlpC proteins from *T. vaginalis*  
301 demonstrated that these LGT-acquired enzymes are capable of degrading bacterial  
302 PG. As in recent examples of bacterial-derived PG-degrading enzymes in eukaryotes  
303 [25,26], this function has been preserved in *T. vaginalis* after LGT and apparent gene  
304 duplications. To examine the potential role of NlpC enzymes in this parasite, we firstly  
305 investigated the effect of co-incubating parasite and bacteria and examined changes  
306 in the expression levels of the endogenous *nlpC* genes by RT-qPCR. Simultaneously,  
307 the mixed cultures were also plated on agar to examine the effect on bacterial cell  
308 numbers.

309 Bacteria and parasites were co-incubated at a 1:10 ratio in a minimal defined  
310 media at 37°C. Samples were taken at 2, 4 and 8 h time points for counting of colony  
311 forming units (cfu) when total RNA was also purified for the RT-qPCR analysis.  
312 Samples of bacteria alone (no parasite) and parasite alone (no bacteria) served as  
313 controls for cfu counts and RT-qPCR readouts, respectively. The cfu counts were used  
314 to calculate the bacterial survival as the ratio of cfu values from mixed versus bacteria-  
315 alone cultures.

316 We observed that *T. vaginalis* upregulates the expression of both NlpC\_A1 and  
317 NlpC\_A2 in the presence of bacteria. At the latest time point (8 h), transcription of both  
318 genes was upregulated by 8-9 fold (Fig 4). Interestingly, the increased expression of  
319 *NlpC* genes was accompanied by a ~20-30% reduction in the number of bacteria as  
320 compared to the control without parasites. This result shows that bacteria trigger  
321 upregulation on the expression of these *NlpC* genes in *T. vaginalis* and that their  
322 activity towards PG degradation, demonstrated by the previous *in vitro* experiments,  
323 may have an impact on bacterial survival.

324

### 325 **Subcellular localization of NlpC\_A1 in *Trichomonas vaginalis***

326 Based on the apparent redundancy at sequence/structure (Figs 1 and 2, S1  
327 Table), activity (Fig 3) and transcriptional regulation (Fig 4), we focused the following

328 experiments on NlpC\_A1 only. In bacteria, NlpC/P60 members often contain either a  
329 signal peptide or a transmembrane region [28]. At this stage, it was unclear if signals  
330 for subcellular compartmentalization would have been ameliorated for accurate protein  
331 targeting and sorting of the TvNlpC/P60 proteins in the parasite (S1 Table). For  
332 NlpC\_A1, bioinformatics analyses identified potential signal peptides but no  
333 transmembrane regions. Hence, to ascertain the subcellular localization of NlpC\_A1  
334 in *T. vaginalis* cells, we undertook an experimental approach.

335 To examine this, the NlpC\_A1 coding domain was expressed with a C-terminal  
336 HA-tag from a plasmid under a strong constitutive promoter. This plasmid was  
337 introduced into *T. vaginalis* by electroporation and transfected cells were drug-  
338 selected. Transfected cells expressing the HA-tagged NlpC\_A1 were used in immuno-  
339 assays with the anti-HA antibody. Immunofluorescence assays showed strong and  
340 consistent surface staining of transfected *T. vaginalis* cells, suggesting that HA-tagged  
341 NlpC\_A1 is located on the plasma membrane (Fig 5). The immune-staining of the cell  
342 surface was patchy, reaching areas of the flagellar membrane. This was consistent  
343 with the results of a crude cell-fractionation protocol that showed the presence of the  
344 HA-tagged NlpC\_A1 in the high-speed membrane pellet fraction of the Western blot  
345 (S4 Fig). Together, these findings provide experimental evidence that NlpC\_A1 is likely  
346 to be located on the cell surface of *T. vaginalis*.

347

### 348 **Profound phenotypic changes upon overexpression of exogenous** 349 **NlpC\_A1 gene**

350 With the observation that *T. vaginalis* were able to reduce the population of  
351 bacteria in mixed cultures (Fig 4), we tested if overexpressing NlpC\_A1 would enhance  
352 this phenotype. With the initially used cell ratio of 1:10 (bacteria:protozoan), NlpC\_A1  
353 *T. vaginalis* transfectant virtually eliminated bacteria in the co-cultures after just 1 h of  
354 co-incubation (S5 Fig). Therefore, we inverted the cell ratio to 10:1

355 (bacteria:protozoan) and included an empty-plasmid transfectant (expressing only the  
356 neomycin selection marker) as a negative control. In addition, we also tested if  
357 bacterial clearance depends on the specific activity of NlpC\_A1 with the expectation  
358 that mutation of a critical catalytic residue (C179S) should diminish this phenotype. For  
359 each time point, bacterial cfu numbers were determined by spotting and spreading co-  
360 cultures on agar plates. The obtained data were reported as the relative cfu obtained  
361 from mixed cultures containing *T. vaginalis* transfected with either WT NlpC\_A1 or the  
362 mutant NlpC\_A1 versus the empty-plasmid *T. vaginalis* transfectant (Fig 6).

363 We observed a significant drop in bacterial cfu counts when *T. vaginalis*  
364 overexpresses the wild-type NlpC\_A1 exogenously (Fig 6). This effect could be readily  
365 observed on the spot plates during the course of incubation (Fig 6, inset) where a  
366 dramatic and time-dependent reduction on bacterial numbers was noticeable on the  
367 spots coming from mixed cultures containing *T. vaginalis* transfected with the WT  
368 NlpC\_A1. By contrast, bacteria maintained similar viability over the course of the  
369 experiment in mixed cultures containing *T. vaginalis* transfected with either the inactive  
370 C179S mutant NlpC\_A1 or the empty plasmid (Fig 6, inset). Quantification of cfu  
371 confirmed the drastic loss in bacterial viability when *T. vaginalis* overexpressed the  
372 wild-type, active form of NlpC\_A1 (Fig 6, line graph). After one hour of co-incubation,  
373 the bacterial population was reduced by 70% and bacteria were virtually eliminated  
374 after 4-6 hours. *T. vaginalis* transfected with the catalytic-inactive NlpC\_A1 (C179S  
375 mutant) or empty plasmid behaved similarly, resulting in a constant bacterial cfu ratio  
376 of ~1 (dotted line) throughout the course of the experiment.

377 To further support the observation that the activity of NlpC\_A1 is responsible  
378 for this phenotype, *T. vaginalis* transfectants were incubated with the *E. coli* strain  
379 CS703-1 which contains a PG highly enriched for pentapeptides [44]. We observed  
380 previously that the recombinant NlpC\_A1 was incapable of digesting pentapeptides in  
381 PG (Fig 3). Therefore, the ability of bacterial clearance by *T. vaginalis* overexpressing  
382 the wild-type NlpC\_A1 might be compromised when co-incubated with bacteria

383 carrying a pentapeptide-rich PG (CS703-1) as compared to bacteria carrying a  
384 tetrapeptide-rich PG (DH5 $\alpha$ ) (Fig 7). Visual inspection of the undiluted mixed cultures  
385 on spread plates after 1 h of co-incubation showed a significant reduction on the  
386 numbers of bacterial colonies regardless of the strain, CS703-1 or DH5 $\alpha$ , when *T.*  
387 *vaginalis* overexpresses the wild-type form of the NlpC\_A1 (Fig 7, left). However,  
388 quantification of cfu indicated that *T. vaginalis* overexpressing the wild-type NlpC\_A1  
389 was partially impaired from clearing CS703-1 as compared to DH5 $\alpha$  by a factor of ~10  
390 (Fig 7, right). This result is consistent with the biochemical evidence that this enzyme  
391 is unable to digest pentapeptides in PG.

392

## 393 **Discussion**

394 To our knowledge, this is the first study to reveal that a laterally-acquired group  
395 of genes enables a eukaryotic mucosal pathogen to control bacterial population. Our  
396 combined unconstrained and constrained phylogenetic analyses support the  
397 hypothesis that these genes were acquired from different bacteria, or possibly one  
398 bacteria and a phage, and expanded through subsequent gene duplications during  
399 evolution of the *Trichomonas* lineage. However, we could not establish with precision  
400 the likely bacterial donor lineage from our phylogenetic analyses, either because  
401 genomes of bacteria closely related to the donor(s) have not yet been sequenced  
402 and/or because the gene transfers took place in the distant past making it more difficult  
403 to infer evolutionary relationships due to important sequence divergence eroding  
404 phylogenetic signal. While some phages encode candidate or functional NlpC/P60 cell  
405 wall peptidases [28], a possible phage origin for TvNlpC/P60 members of clan A was  
406 only weakly supported in all of our unconstrained phylogenetic analyses (Fig. 1C), The  
407 combination of BlastP searches, unconstrained and constrained phylogenetic  
408 analyses indicates that the two TvNlpC/P60 distinct gene families were likely acquired



409 by two independent LGTs and further supports several independent LGT events in  
410 other eukaryotic lineages, as recently reviewed by Husnik and McCutcheon [22].

411 Consistent with relatively ancient LGT event(s) into the *Trichomonas* lineage,  
412 analyses of GC% profile variation of the nine scaffolds encoding the nine TvNlpC/P60  
413 genes, we observed that seven genes were located in segments with average GC%  
414 composition characteristic of the *T. vaginalis* genome (~31-32 GC%) and were not  
415 located close to segmentation points (S1 Table and S6 Fig). This is in contrast to the  
416 relatively recent candidate LGT likely derived from a bacterial donor from the urogenital  
417 tract identified on a ~53 kbp *T. vaginalis* genome sequence scaffold [35]. A segment  
418 of ~34 kbp encodes 27 proteins highly similar (range: 79–98% identity) and with long  
419 stretches of gene synteny with the bacteria *Peptoniphilus harei*. This case is  
420 characterised by a strong GC% segmentation point between the ~34 kbp segment  
421 encoding the 27 bacterial-like genes and the rest of the scaffold [15,36]. One  
422 TvNlpC/P60 gene (TVAG\_393610, DS113268, S1 Table) was located beside a  
423 segmentation point on a region with >30 GC% content which was correlated with the  
424 presence of repetitive elements, well known to litter the highly repetitive genome of *T.*  
425 *vaginalis* [14] rather than a Bacterial-like segment of DNA. By investigating the GC%  
426 profile of the open reading frames (ORFs) from all nine TvNlpC/P60 genes, a  
427 correlation between codon GC% profile and clan membership was observed. The  
428 ORFs from the respective members of clan A were more similar to each other (GC%  
429 from 38.5 to 40.6) than to the ORFs from the other clan B (GC% from 44.1 to 50.0) (S1  
430 Table). This is also consistent with two genes families derived from distinct LGT events  
431 and followed by gene duplications.

432 Transcriptional upregulation of NlpC\_A1 and NlpC\_A2, as induced by glucose  
433 starvation [16,] and by bacteria (as shown here), supports the functional integration of  
434 these genes of bacterial origin in *T. vaginalis*. These independent observations  
435 indicate that these genes have acquired optimal codons and promoters that confer  
436 proper gene expression and regulation upon specific environmental conditions. In

437 other words, these genes have been fully integrated into the biology of the parasite  
438 through amelioration [45]. As anticipated for NlpC/P60 enzymes, the tri-dimensional  
439 structure and catalytic function have been preserved in the two members of this group  
440 of enzymes (NlpC\_A1 and NlpC\_A2) that we have characterized here. These LGT-  
441 derived genes in *T. vaginalis* encode functional DL-endopeptidases that have specific  
442 activity towards PG, a unique polymer that constitutes an essential component of the  
443 bacterial cell envelope.

444 NlpC\_A1 and NlpC\_A2 are apparently redundant in structure and function.  
445 Their high-resolution structures revealed a classical papain-like NlpC/P60 domain in  
446 addition to two bacterial SH3 domains under a specific arrangement. The open 'T'-  
447 shaped groove includes the catalytic triad Cys-His-His which was shown here, as  
448 predicted, to be necessary for its activity. Both enzymes are active against PG cleaving  
449 the chemical bond between D-isoGlu and *m*-DAP residues on tetrapeptides in  
450 monomeric and dimeric peptidoglycan subunits. However, curiously, neither of them  
451 can cleave the same bond if the PG substrate is a pentapeptide or tetrapentapeptide.  
452 During bacterial cell wall synthesis, the fifth (terminal) D-alanine residue of  
453 pentapeptide donor peptides is removed during transpeptidation reactions, but newly  
454 made (nascent) peptidoglycan still contains a high percentage of pentapeptides in  
455 monomers and dimers [46]. In many species, for example *E. coli*, the majority of these  
456 pentapeptides are trimmed to tetrapeptides by DD-carboxypeptidases during  
457 peptidoglycan maturation, resulting in a mature, tetrapeptide-rich peptidoglycan [47].  
458 Therefore, *T. vaginalis* NlpC\_A1 and NlpC\_A2 are apparently optimized to digest  
459 mature bacterial cell walls consistent with functional enzymes targeting mature  
460 bacterial substrates in the native habitat of the parasite.

461 We found that, when bacteria and parasites were co-incubated in a minimal  
462 media, the expression of NlpC\_A1 and NlpC\_A2 was upregulated and this was  
463 accompanied by a reduction on the numbers of viable bacteria. Interestingly, glucose  
464 restriction also leads to transcriptional upregulation of these two *T. vaginalis* NlpC/P60

465 genes [16]. In the vaginal microenvironment, where glucose can be restricted and  
466 bacteria are abundant, it is possible that *T. vaginalis* overexpresses these enzymes to  
467 target bacteria as a source of nutrition. PG turnover during bacteria replication or  
468 bacterial lysis will release PG fragments among other metabolites which *T. vaginalis*  
469 could scavenge for, by using its own repertoire of NlpC/P60 and perhaps additional  
470 enzymes.

471 In bacteria, NlpC/P60 enzymes are often secreted into the periplasm or growth  
472 medium. To date, *T. vaginalis* NlpC/P60 enzymes have not been detected in  
473 proteomics surveys of surface or secreted proteins [48–50], perhaps because their  
474 expression depends substantially on environmental factors such as glucose restriction  
475 [16] and presence of bacteria (as found in this study). In *T. vaginalis*, we have shown  
476 that NlpC\_A1 localizes on the surface of the parasite. However, the process by which  
477 these enzymes reach the peptidoglycan of the target bacteria remains to be  
478 determined. In the case of Dae2 (a NlpC/60 protein), which was laterally inherited by  
479 the tick *Ixodes scapularis* from bacteria, bacteriolytic activity is only detected if this  
480 enzyme is delivered to the periplasm of *E. coli* or if the outer membrane is  
481 permeabilized [26].

482 Although the overexpression of NlpC\_A1 in *T. vaginalis* significantly enhances  
483 the ability of the pathogen to control bacterial population in co-cultures, the purified  
484 recombinant enzyme is not itself bacteriolytic. This was demonstrated by incubating *E.*  
485 *coli* with the purified enzyme and comparing to the well-known bacteriolytic activity of  
486 lysozyme (S7 Fig). Therefore, other factors or additional enzymes such as cationic  
487 antimicrobial peptides and lysozyme [51] (of either microbial or human origins) might  
488 possibly enable *T. vaginalis* NlpCs to reach the peptidoglycan of vaginal bacteria.  
489 Vaginal secretions are known to have the highest level of lysozyme among other  
490 human mucosa-derived fluids [52]. Finally, direct contact between parasite and  
491 bacteria and parasite-mediated phagocytosis could possibly facilitate the action of  
492 these enzymes.

493           The profound reduction in viable bacteria, when a functional exogenous copy  
494 of NlpC\_A1 gene was constitutively expressed under a strong promoter in *T. vaginalis*,  
495 provided *T. vaginalis* a striking ability of controlling bacterial population in co-cultures  
496 even in the presence of a 10-fold excess of bacteria. This phenotype was dependent  
497 on the activity of this enzyme since *T. vaginalis* transfected with the catalytic-inactive  
498 NlpC\_A1 (C179S) did not display such activity beyond the background. Additionally,  
499 this phenotype replicates the inability of digesting the pentapeptide-rich PG as observed  
500 with the recombinant enzyme. We have not characterized all members of this family in  
501 *T. vaginalis* neither examined their broad bacterial activity yet. However, our study  
502 suggests that *T. vaginalis* NlpC enzymes may act as cell-wall degrading toxins. This is  
503 supported by their structural data, cytolocalization and the impact on bacterial survival  
504 from mixed cultures when the parasite overexpresses NlpC\_A1. In contrast to the  
505 housekeeping NlpC/P60 PG hydrolases of bacteria, the structures of *T. vaginalis*  
506 NlpC\_A1 and NlpC\_A2 revealed an open and highly accessible active site which is  
507 characteristic of a cell-wall degrading toxin [53].

508           The functional redundancy of *T. vaginalis* NlpC\_A1 and NlpC\_A2 may be  
509 complemented by the other NlpC/P60 members in the parasite. Such apparent  
510 redundancy in peptidoglycan enzymes is well known in the PG biogenesis of bacteria  
511 and mostly evident in PG hydrolysis. *E. coli*, for instance, has 6 PG endopeptidases,  
512 4 amidases and 8 lytic transglycosylases with distinct biochemical properties [54].  
513 Together, the combined activities in each set of seemingly redundant enzymes allow  
514 robust growth even at different conditions. This is important because the properties of  
515 the periplasm (e.g. osmolarity and pH), where these enzymes function, depends on  
516 the environmental conditions [54]. Similarly, *T. vaginalis* could maintain a seemingly  
517 redundant set of NlpC/P60 enzymes to target PG of different vaginal bacteria (e.g.  
518 Gram-negative and/or -positive), at different conditions and locations. Indeed, these  
519 different enzymes may act inside phagosomes or extracellularly including at the cell  
520 surface or in secretions. Consistent with these possibilities, one gene from clan B

521 (TVAG\_209010) was characterised by a distinct higher level of transcription in two  
522 RNASeq surveys compared to all other TvNlpC/P60 genes [16,17] with in particular a  
523 dramatic upregulation across 36 hours of incubation in the absence of glucose [16] (S1  
524 Table).

525 At this stage, the contribution of these enzymes to pathogenesis is still  
526 unknown. However, several possibilities can be envisaged. Firstly, *T. vaginalis* might  
527 benefit from the released PG fragments and other bacteria derived metabolites by  
528 using them as nutrients. Secondly, controlling bacterial populations will not only reduce  
529 microbial competition but also prevent the protective function of the host microbiota  
530 favouring *T. vaginalis* propagation. Thirdly, molecules from PG degradation are known  
531 ligands of pattern recognition receptors in the host [55,56]. Therefore, *T. vaginalis* NlpC  
532 activity may have a role on modulating immune responses altering the outcomes of  
533 the infection. Lastly and more speculative, these enzymes may explain the association  
534 of *T. vaginalis* with a particular community of vaginal bacteria [12] and/or with  
535 mycoplasmas [57]. Mycoplasmas are very frequently found as intracellular symbionts  
536 of *T. vaginalis*. We speculate that the lack of PG and a rigid cell wall may have allowed  
537 them to become successful symbionts of this parasite.

538 The interaction of *T. vaginalis* with the microbiota has historically escaped  
539 much consideration from parasitologists, microbiologists and clinicians alike. Our study  
540 reports a novel aspect on the biology of *T. vaginalis*. It indicates that this parasite  
541 utilizes hydrolases active against peptidoglycan, a major and very specific component  
542 of bacterial cell walls. Interestingly, our combined data support a model in which these  
543 PG DL-endopeptidase genes from *T. vaginalis* (i) were acquired by LGT from bacteria,  
544 (ii) were expanded and ameliorated through evolution and (iii) are being used by the  
545 parasite to control bacterial populations. In future, it will be important to understand the  
546 specificity, redundancy and/or complementarity of this expanded family of LGT-  
547 acquired genes with regards to their potential impact on the composition of the human  
548 vaginal microbiota and how these might contribute to pathogenesis.

549

## 550 **Materials and Methods**

### 551 **General sequence analyses and phylogeny**

552 The structural organization of the *T. vaginalis* NlpC/P60 proteins was  
553 investigated with InterProScan [58]. The potential presence of N-terminal signal  
554 peptides for RER targeting was inferred with Phobius [59], SignalPv4.1 [60] and  
555 SPOCTOUS [61]. In order to compile an alignment of homologues, BlastP searches  
556 at the NCBI were performed against nr, RefSeq or Env\_nr (Metagenomic proteins) and  
557 with one protein member of each of the two *T. vaginalis* NlpC/P60 clusters identified  
558 at EupathDB/TrichDB [29] (S1 Table, illustrated in Panel A). In addition, a more  
559 sensitive DELTA-Blast search against RefSeq was performed to identify potential  
560 homologues in eukaryotes other than *T. vaginalis*.

561 To investigate the phylogenetic position of the nine *T. vaginalis* NlpC/P60  
562 proteins, selections of top hits of the different BlastP searches were combined to  
563 generate an alignment maximising taxonomic representation. The alignment was  
564 trimmed with trimAl (option: gappyout) [62] to 104 residues to ensure that a  
565 conservative selection of well-aligned residues was used for the phylogenetic  
566 inference. The alignment was analysed with SMS [63] in order to establish the best  
567 fitting model based on single amino acid replacement matrices available within PhyML  
568 for the NlpC/P60 protein alignment, which was LG +G4 +I for both the Akaike  
569 information criterion (AIC) and Bayesian information criterion (BIC). Additional protein  
570 mixture evolutionary models were also considered (LG4X [64] and C20 model [65]) as  
571 they were shown to be more reliable in the context of alignments were sequences  
572 evolve at different rate and some aligned sites are saturated in relation to phylogenetic  
573 signal/noise. Unconstrained phylogenetic analyses were performed with either PhyML  
574 [66] within SEAVIEW v4.5.3 [67] or IQ-TREE [68,69] with either unique exchange rate  
575 matrix based models (LG+G4+I or LG+G4+I+F) or empirical protein mixture models

576 (LG4X+R+F or C20+R). Constrained analyses forcing specific relationships including  
577 (i) all nine TvNlpC/P60 entries being monophyletic or TvNlpC/P60 being monophyletic  
578 with either (ii) two fungal (*Aspergillus* and *Metarhizium*), (iii) the amoeba  
579 (*Acanthamoeba*) or (iv) the parasitic worm (*Trichuris trichura*) sequences were  
580 performed with IQ-TREE, as were Approximate Unbiased (AU) tree topology tests that  
581 is currently the most appropriate test for comparing multiple trees [70]. The maximum  
582 likelihood tree (model LG+G4+I) was edited using iTOL [71] to generate Figure 1B.

583 The alien index (AI) for the TvNlpC/P60 genes were calculated as described  
584 by Rancurel et al. [31] using BlastP outputs from the NCBI Blast server (BLAST+ 2.8.0-  
585 alpha released at: <https://blast.ncbi.nlm.nih.gov/Blast.cgi>) and recording the E-values  
586 of the top Prokaryotic hit (in all cases a Bacterium) and the top non-self eukaryotic hit  
587 (all values are listed in S1 Table).

588 The GC% variation profiles of the nine scaffolds that encode the TvNlpC/P60  
589 genes were analysed with GC-profile server [72]. Details of the analyses for each  
590 scaffold are provided in the S6 Fig with the GC% variation profiles. The GC% of the  
591 TvNlpC/P60 ORFs were analysed with the CAIcal server [73]. All values are listed for  
592 each gene/scaffolds in S1 Table.

593

## 594 **Microbial cultures and co-incubation assay**

595 *Escherichia coli* strains BL21(DE3) and DH5 $\alpha$  (Invitrogen), MC1061 and  
596 CS703-1 [44] were grown in Luria-Bertani (LB) media with agitation at 37 °C.  
597 *Trichomonas vaginalis* reference strain G3 was cultured in TYM medium [74]  
598 supplemented with 10% horse serum, 10 U/mL penicillin and 10 ug/mL streptomycin  
599 (Invitrogen) with no agitation at 37 °C.

600 To measure the effects of *T. vaginalis* on the survival of *E. coli*, the following  
601 co-incubation assay protocol was developed. Prior to the assays, the number and  
602 viability of *E. coli* and *T. vaginalis* were assessed and only cultures with at least 95%

603 viability were used. For *E. coli*, these were assessed by flow cytometry using BD™ cell  
604 viability kit and the Accuri™ C6 flow cytometer (BD Biosciences) as previously  
605 described [75]. *T. vaginalis* was grown in the absence of antibiotics to a maximum  
606 concentration of  $\sim 1 \times 10^6$  cells/mL, as counted by a haemocytometer, when virtually  
607 all cells were alive and motile. Microbial cultures were spun down, washed and  
608 resuspended in antibiotic- and serum-free Keratinocyte-SFM media (Gibco). *T.*  
609 *vaginalis* ( $5 \times 10^5$  cells/mL) was mixed with bacteria at specified cell ratios in a 12- or  
610 24-well tissue culture plate and in a volume of 0.5-1.0 mL respectively and at 37 °C.  
611 Cell ratio and time of incubation were indicated for each experiment. As controls, *T.*  
612 *vaginalis* and bacteria were incubated alone in parallel and under the same conditions.  
613 When countable numbers of bacterial colony forming units (cfu) were needed, serial  
614 dilutions of the co-cultures were done in sterile water. Undiluted or diluted co-cultures  
615 were spotted or spread-plated on LB-agar plates and incubated overnight at 37 °C.  
616 This procedure is selective for *E. coli*, preventing growth of *T. vaginalis*. Three  
617 independent experiments were carried out. Plates were photographed using a Canon  
618 40D camera with canon 50 mm macro f2.5 or 100 mm macro f2.8 lenses and  
619 analysed.

620

### 621 **Reverse transcription and quantitative PCR (RT-qPCR)**

622 To compare the changes on expression of *T. vaginalis* NlpC\_A1 and NlpC\_A2  
623 genes upon exposure to bacteria, total RNA was obtained with TRIzol (Invitrogen) from  
624 the co-incubation assay cultures containing either *T. vaginalis* with *E. coli* or *T.*  
625 *vaginalis* alone. This RNA was treated with DNase I (Ambion), ethanol precipitated and  
626 cleaned further with the mini RNeasy MinElute clean-up kit (Qiagen). Reverse  
627 transcription was achieved from 5  $\mu$ g of this purified total RNA using Superscript RT  
628 III supermix and oligo dT primers, as recommended (Invitrogen). To ensure that RNA



629 samples were DNA-free, reactions omitting the reverse transcriptase (-RT) were done  
630 in parallel.

631 Primers targeting *T. vaginalis* NlpC\_A1 or TVAG\_119910 (forward-  
632 TCACAATTCCAACCCAATCTG; reverse-CTCCGTCATTTGCACCATCT) and  
633 NlpC\_A2 or TVAG\_457240 (forward-TAAGACCAAGCTTGGCTGC; reverse-  
634 TTCCGACATACATTCCGAC) were used for quantitative real-time PCR (qPCR).  
635 Primers targeting *T. vaginalis* HSP70 TVAG\_237140 (forward-  
636 ACACAGGCGAGAGACTCGTT; reverse-TCTTTGACCCAAGCATCTCC) were used  
637 for normalization. qPCR assays were carried out to validate specificity and efficiency  
638 of each pair of primers and, as recommended, the threshold cycle (Ct) and the base  
639 line were set up (7900 HT- Realtime instructions, Applied Biosystems). With this  
640 validation, the Ct method was then applied for the relative quantification of NlpC gene  
641 expression using the Ct method (equation  $2^{-\Delta\Delta CT}$ ). qPCR reactions were carried out  
642 using 10 ng of cDNA, 200 nM of each primer and PowerUP SYBR Green Master Mix  
643 (Thermofisher) following recommendations (Applied Biosystems). For each one of the  
644 three independent co-incubation assays, PCR reactions were carried out in triplicates.  
645 In addition to the -RT samples, parallel reactions without any template (water instead)  
646 were added as negative controls. qPCR data for NlpC expression were normalised  
647 against HSP70 and analysed using the SDS 2.3 and RQ Manager 1.2 applications  
648 (Applied Biosystems). Subsequent statistical analyses were then carried out using the  
649 Relative Expression Software Tool (REST©) [76].

650

### 651 **Plasmids, PCR and DNA cloning**

652 The MasterNeo plasmid was used for cloning and expression of NlpC\_A1 in *T.*  
653 *vaginalis* [77]. The insertion of a coding sequence into this plasmid, using *NdeI* and  
654 *Asp718* restriction sites, provides a strong constitutive promoter for transcription and  
655 a double-hemagglutinin (HA) tag on the C-terminus of the protein. In addition,  
656 MasterNeo can replicate in *E. coli* and *T. vaginalis* allowing selection of transformants

657 by ampicillin and G418 respectively [77]. The full coding sequence of NlpC\_A1 was  
658 PCR-amplified from *T. vaginalis* genomic DNA with specific primers carrying those  
659 restriction sites and cloned into MasterNeo. A MasterNeo plasmid containing no  
660 exogenous gene (empty-plasmid), except for the neomycin selectable marker, was  
661 kindly donated by Patricia Johnson (UCLA). Transfection of *T. vaginalis* was achieved  
662 using the GenePulser Xcell electroporator (Bio-Rad), as previously described [77].

663 The pET47b plasmid (Novagen) was used for cloning and expression of  
664 NlpC\_A1 and NlpC\_A2 in *E. coli*. Coding sequences were PCR-amplified from *T.*  
665 *vaginalis* genomic DNA with specific primers aiming a ligation-independent cloning  
666 strategy [78]. Transformation of *E. coli* was achieved by standard heat-shock or  
667 electroporation protocols. Site-direct mutagenesis of NlpC\_A1 and NlpC\_A2, a single  
668 substitution of cysteine-179 to either serine or alanine, was achieved by inverse PCR  
669 using either the MasterNeo or pET47b plasmids as DNA template. All PCR reactions  
670 were performed with high-fidelity Phusion polymerase (ThermoFisher Scientific) or  
671 KOD polymerase (Novagen) using the Mastercycler pro thermocycler (Eppendorf). All  
672 PCR-derived inserts were fully sequenced from their individual plasmids  
673 (<http://www.sbs.auckland.ac.nz/en/for/researchers-2/cpgm.html>).

674

### 675 **Expression and purification of recombinant NlpC\_A1 and NlpC\_A2**

676 NlpC\_A1 and NlpC\_A2 were expressed in *E. coli* BL21(DE3), a strain  
677 optimized for protein expression (Invitrogen). Cultures containing 25 µg/mL kanamycin  
678 were prepared at 37 °C prior to induction of protein expression. A single colony from a  
679 fresh transformation was seeded into a 5 mL culture. Following incubation overnight,  
680 this culture was scaled up to 750 mL. Once culture reached an OD (600 nm) of 0.4-  
681 0.6, they were transferred to 18 °C for 30 min. Protein expression was then induced  
682 by the addition of 0.5 mM IPTG and further incubation at 18 °C overnight. Cells were

683 harvested by centrifugation, resuspended in 20 mM Tris/HCl pH 7.8 and frozen until  
684 required.

685 To purify the proteins, cell pellets were thawed and resuspended in lysis buffer  
686 (20 mM Tris/HCl pH 7.8, 300 mM NaCl, 0.5 mM TCEP, 20 mM imidazole, 10%  
687 glycerol). To preserve the activity of the proteins interest (which are candidate  
688 /peptidases), protease inhibitors were omitted from the purification procedure. Cells  
689 were lysed using a constant systems cell disruptor and the resulting lysate cleared by  
690 centrifugation (14000  $xg$ , 30 min, 4 °C). NlpC proteins were then purified by  
691 immobilised metal affinity chromatography and eluted using a step gradient in 20 mM  
692 Tris/HCl pH 7.8, 300 mM NaCl, 0.5 mM TCEP, 300mM imidazole. Fractions containing  
693 NlpC proteins were pooled and dialysed overnight against 10 mM Tris/HCl, 25 mM  
694 NaCl, 0.1 mM TCEP with the addition of 3C-protease to remove the N-terminal His-  
695 tag.

696 NlpC proteins were further purified by anion exchange chromatography using  
697 a 6 mL Resource Q column and eluted on a gradient of 0-0.5 M NaCl. This was  
698 followed by a final size-exclusion chromatography step using a Superdex 75 16/60  
699 column equilibrated in 10 mM Tris/HCl pH 7.8, 150 mM NaCl, 0.1 mM TCEP and eluted  
700 isocratically. Proteins were concentrated using a 10KDa cut-off Vivaspin centrifugal  
701 concentrators. Protein concentration was determined by UV/Vis-spectroscopy using  
702 the following theoretical masses and extinction coefficients: NlpC\_A1 31415 Da,  $\epsilon$   
703 <sub>280nm</sub> 63510 M<sup>-1</sup>cm<sup>-1</sup>; NlpC\_A2, 31394 Da,  $\epsilon$  <sub>280nm</sub> 66155 M<sup>-1</sup>cm<sup>-1</sup>. For the Seleno-  
704 Methionine (SeMet) substituted NlpC\_A1, expression in BL21(DE3) cells was  
705 achieved in PASM-505 media using the inhibition method [79] and the recombinant  
706 protein was then purified as described above.

707

708 **Protein structure determination of NlpC\_A1 and NlpC\_A2**

709 Crystallisation of NlpC\_A1 (16 mg/mL) and NlpC\_A2 (14.5 mg/mL) were  
710 undertaken by sitting drop vapour diffusion using 96-well intelli-plate crystallisation  
711 trays using the morpheus screen [80] and our in-house robot screens [81]. Drops  
712 consisted of 0.5  $\mu$ L of protein mixed with 0.5  $\mu$ L of reservoir solution. Crystals of  
713 NlpC\_A1 grew in condition A1 of the Morpheus screen (10% PEG20K, 20%  
714 PEG550mme, 0.06 M Divalents, 0.1 M imidazole-MES pH 6.5). Crystals of NlpC\_A2  
715 grew in 0.2 M Ammonium Fluoride, 20% PEG3350.

716 For data collection, individual crystals of NlpC\_A1 were harvested and directly  
717 frozen by plunging into liquid nitrogen. Crystals of NlpC\_A2 were harvested and briefly  
718 transferred into a cryoprotectant solution consisting of reservoir solution supplemented  
719 with 20% glycerol before freezing in liquid nitrogen. X-ray diffraction data were  
720 collected using our in-house X-ray generator consisting of a Rigaku Micromax-007HF  
721 rotating anode equipped with a copper anode, osmic focussing optics and MAR345  
722 detector. Crystals of NlpC\_A1 were also stored and sent to the Australian Synchrotron  
723 for high-resolution data collection.

724 The structure of NlpC\_A1 was determined by single isomorphous replacement  
725 using Native and SeMet data collected from our in-house X-ray suite. Selenium sites  
726 were identified using the SHELXC/D/E pipeline [82] within the CCP4 program suite  
727 [83]. Phases were then used to build an initial model in PHENIX [84] followed by  
728 iterative rounds of model building and refinement in Coot [85] and PHENIX [84]. The  
729 structure of NlpC\_A2 was determined by molecular replacement using PHASER [86]  
730 with NlpC\_A1 as a search model. The model was built and refined in Coot and  
731 PHENIX.

732

### 733 **Enzymatic activity of recombinant NlpC\_A1 and NlpC\_A2**

734 Equal quantities of purified PG (0.5 mg/mL) from *E. coli* strains MC1061 [43]  
735 and CS703-1 [44] were mixed and used for the activity assays. NlpC\_A1 or NlpC\_A2

736 were incubated at varied concentrations (0.1, 1.0 and 10  $\mu$ M) with the *E. coli* PG  
737 mixture in 20 mM Tris/HCl pH 7.5, 150 mM NaCl for 4 h at 37 °C on a Thermomixer at  
738 750 rpm. A control sample received no enzyme. The inactive mutants  
739 NlpC\_A1(C179A), NlpC\_A1(C179S), NlpC\_A2(C179A) and NlpC\_A2(C179S) were  
740 used at the highest concentration (10  $\mu$  M). The reaction was stopped by the addition  
741 of 1/4 volume of 80 mM sodium phosphate pH 4.8 and incubation at 100 °C for 5 min.  
742 The samples were incubated overnight with 10  $\mu$ g of cellosyl (Hoechst, Frankfurt am  
743 Main, Germany) at 37 °C on a Thermomixer at 750 rpm. Following the second  
744 incubation, the samples were incubated at 100 °C for 10 min and centrifuged at room  
745 temperature for 15 min at 16,000 $\times$ g. The muropeptides present in the supernatant  
746 were reduced with sodium borohydride and separated by HPLC as described [87,88].  
747

#### 748 **Subcellular localization of NlpC\_A1**

749 Prediction of subcellular localization of NlpC\_A1 was attempted using  
750 SignalP4.1 Server (<http://www.cbs.dtu.dk/services/SignalP/>), PHOBIUS  
751 (<http://phobius.sbc.su.se/>), TargetP (<http://www.cbs.dtu.dk/services/TargetP/>) and  
752 TMHMM (<http://www.cbs.dtu.dk/services/TMHMM/>). Nevertheless, taking advantage  
753 of the C-terminally HA-tagged NlpC\_A1 in the transfected *T. vaginalis*, subcellular  
754 localization was verified experimentally by immunofluorescence microscopy, cell  
755 fractionation and Western blot.

756 A standard immunofluorescence protocol was used for localization of the HA-  
757 tagged NlpC\_A1 in *T. vaginalis* cells. NlpC\_A1-transfected *T. vaginalis* ( $\sim 10^7$  cells, in  
758 total) were pelleted, washed with phosphate-saline buffer (PBS) and fixed with cold  
759 methanol for 10 min. Methanol-fixed cells were washed three times with PBS and  
760 incubated with 3% bovine serum albumin (BSA) in PBS for 30 min. Cells were pelleted  
761 and resuspended with the same 3% BSA in PBS but containing the primary anti-HA  
762 (Covance) at 1:1,000 dilution. After 1 hour of incubation, cells were washed three times

763 with 3% BSA in PBS and resuspended in this solution containing Alexa Fluor-  
764 conjugated secondary antibody (Invitrogen) at 1:5,000 dilution. After 1 hour of  
765 incubation and additional three washes, ~ 10  $\mu$ L of cells were spotted on a microscope  
766 slide along with ~20  $\mu$ L of ProLong Gold antifade reagent containing 4'-6-diamidino-2-  
767 phenylindole or DAPI (Invitrogen) and covered with a coverslip. Images were taken  
768 using a Nikon Ni-U microscope equipped with a Spot Pursuit Slider camera (greyscale,  
769 cooled, 1.4 megapixel, with colour by filter) and analyzed by its built-in Spot software.  
770 Non-transfected *T. vaginalis* cells, used as negative control, did not produce any  
771 detectable signal above the background with the anti-HA antibody.

772 Alternatively, a cell fractionation protocol [89] was applied to NlpC\_A1-  
773 transfected *T. vaginalis*. A total of ~ $10^8$  cells were pelleted and washed firstly with PBS  
774 followed by buffer A (10 mM HEPES, 1.5 mM MgCl<sub>2</sub>, 10 mM KCL, 0.5 mM DTT), 1 mL  
775 each. The cell pellet was then resuspended in 1 mL of buffer A per gram of cells and  
776 incubated for 10 min. Cells were burst by 5-10 passages through a 25G-needle  
777 syringe. The cell lysate was taken through steps of differential-speed centrifugation  
778 [89]. Protein fractions corresponding to organelles (including nuclei), cytosol and cell  
779 membrane were obtained. All procedures were carried out on ice-temperature with all  
780 solutions containing protease inhibitor cocktail (complete mini, Roche). In addition to  
781 these crude cell fraction protein extracts, a whole-cell protein extract was prepared in  
782 parallel. Importantly, each fraction was brought up to equivalent volumes as to the  
783 whole cell extract to allow comparisons after SDS-PAGE and Western blot analyses.  
784 Replicas of SDS-PAGE gels were stained with Coomassie blue and blotted to PVDF  
785 membranes. Western blots were probed with either a mouse monoclonal anti-HA  
786 (Covance) or a rabbit polyclonal anti-ferredoxin (kindly donated by Patricia Johnson,  
787 UCLA), an organellar marker for *T. vaginalis* which recognizes a typical  
788 hydrogenosomal protein. Mouse- and rabbit-specific secondary antibodies conjugated  
789 to horseradish peroxidase were used for chemiluminescent detection, as  
790 recommended (ThermoFisher Scientific), with the imager Fuji LAS-4000.

791

## 792 **Acknowledgements**

793 We are grateful for the financial support received from the different funders: the  
794 Health Research Council of New Zealand, the Maurice & Phyllis Paykel Trust, the  
795 Faculty of Science Research Development Fund (University of New Zealand), the  
796 Royal Society of New Zealand and the Wellcome Trust. AS-B thanks Patricia Johnson  
797 (UCLA) for kindly donating the empty MasterNeo plasmid and the anti-ferredoxin  
798 antibody. AS-B thanks Patricia Johnson and her research group members for  
799 invaluable constructive criticisms and inputs on the detailed aspects of this research.  
800 The authors want to acknowledge the helpful assistance from technical team of the  
801 DNA sequencing core facility at the University of Auckland. Finally, the authors also  
802 want to acknowledge the NZ synchrotron group for access to SAXS and MX beamlines  
803 at the Australian Synchrotron.

## 804 **Figure legends**

805

806 **Fig 1. Bioinformatic analyses of the *T. vaginalis* NlpC/P60 proteins.** (A) Structural  
807 organisation for one representative (locus tags are indicated) of each of the two  
808 clusters (A and B) of *T. vaginalis* NlpC/P60 proteins (see S1 Table and main text). Two  
809 TvNlpC/P60 proteins (cluster A), named NlpC\_A1 (TVAG\_119910) and NlpC\_A2  
810 (TVAG\_457240, illustrated), possess a bacterial SH3 domain (orange pentagon)  
811 identified in addition to the NlpC/P60 domain (green rectangle). (B) N-terminus protein  
812 alignment for all nine *T. vaginalis* NlpC/P60 proteins. Locus tags are indicated and the  
813 arrowheads indicate the five entries with inferred Signal Peptide (S1 Table). Members  
814 of cluster A are more similar to each other than they are to members of cluster B and  
815 vice versa. (C) Phylogenetic relationship inferred by maximum likelihood from a protein  
816 alignment of 104 residues with the model LG+G4+I. Bootstrap support values above  
817 50% are indicated and the scale bar show the inferred number of substitutions per site.  
818 The two TvNlpC/P60 proteins clusters were recovered as distinct clans (red boxes A  
819 and B). Eukaryotic sequences from non-Trichomonas species are indicated by red  
820 squares and branches. Blue and black circles are from three Gram-negative bacteria  
821 and from a phage respectively. The sequences RefSeq accession numbers are  
822 indicated. Among eukaryotes the letter “A” and “F” following the species names refers  
823 to Animal (Metazoan) and Fungi respectively.

824

825 **Fig 2. Structure of NlpC\_A1 and NlpC\_A2.** (A) Orthogonal views of a cartoon  
826 representation of the structure of NlpC\_A1. Secondary structure elements are labelled,  
827 N- and C- termini are indicated. The NlpC domain is colored in blue with the two SH3b  
828 domains shaded in orange. (B) Superposition of the NlpC\_A1 and NlpC\_A2 structures.  
829 The two structures superimpose with an RMSD of 0.491Å across all equivalent atoms.  
830 (C) Electrostatic surface representation of the NlpC\_A1 active site groove including



831 the description of the catalytic triad Cys179-His234-His246. Location of the “T” shaped  
832 groove is marked with a dashed line.

833

834 **Fig 3. NlpC\_A1 and NlpC\_A2 are DL-endopeptidases.** (A) HPLC chromatograms of  
835 *E. coli* peptidoglycan cleavage assays with control (no enzyme) and increasing  
836 concentrations of NlpC\_A1 or NlpC\_A2. Peaks of the major muuropeptides were  
837 assigned by comparison with published literature and are labelled as Tetra, Penta,  
838 TetraTetra and TetraPenta. NlpC\_A1 and NlpC\_A2 produce the muuropeptides Di and  
839 Hexa. (B) Structure of the muuropeptides labelled on the chromatograms. MurNAc(r),  
840 reduced N-acetylmuramic acid; GlcNAc, N-acetylglucosamine; L-Ala, L-alanine; D-  
841 iGlu, iso-D-glutamic acid; m-Dap, meso-diaminopimelic acid; D-Ala, D-alanine. (C)  
842 Schematic diagram of the undigested *E. coli* peptidoglycan with the indication of the  
843 cleavage sites of NlpC\_A1 and NlpC\_A2 (blue arrows).

844

845 **Fig 4. A reduction in *E. coli* numbers is accompanied by transcription**  
846 **upregulation of NlpC\_A1 and NlpC\_A2 genes in *T. vaginalis*.** *E. coli* was incubated  
847 in the absence or in the presence of *T. vaginalis* at a ratio of one bacterium to ten  
848 protozoan cells and up to 8 hours. The cfu counts were used to calculate bacterial  
849 survival (line graph following the y-axis to the right). Bacterial survival was expressed  
850 as a ratio of cfu in the presence versus absence of *T. vaginalis*. Simultaneously, *T.*  
851 *vaginalis* in the absence of bacteria served as the base line for the RT-qPCR (bar  
852 graph following the y-axis to the left). Relative quantification of NlpC\_A1 and NlpC\_A2  
853 mRNA abundance (white and grey bars, respectively) was achieved by comparing *T.*  
854 *vaginalis* in the presence versus absence of bacteria for each time point. The  
855 housekeeping gene HSP 70 was used as a reference and the Ct method was applied  
856 for relative quantification of gene expression (see Methods). The values are mean  $\pm$   
857 SD of three independent experiments.

858

859 **Fig 5. Subcellular localization of HA-tagged NlpC\_A1 in *T. vaginalis*.** The parasite  
860 was stably transfected with plasmids expressing HA-tagged NlpC\_A1 protein.  
861 Immunofluorescence microscopy, using primary HA-specific and secondary FITC-  
862 conjugated antibodies, indicates that the NlpC\_A1 is present on the membrane of the  
863 protozoan cells. The nucleus was stained with DAPI for reference. Three independent  
864 images (total magnification of 1000X) are shown.

865

866 **Fig 6. *T. vaginalis* promotes clearance of *E. coli* DH5 $\alpha$  from mixed cultures when**  
867 **over-expressing NlpC\_A1 constitutively.** *T. vaginalis* was stably transfected with  
868 plasmids expressing no NlpC\_A1 protein (Empty), the HA-tagged NlpC\_A1 mutated  
869 at the catalytic residue C179S (Mutant) or the HA-tagged NlpC\_A1 wild-type (WT). *E.*  
870 *coli* was incubated in the presence of each of the transfected *T. vaginalis* at a ratio of  
871 ten bacteria to one protozoan cell and up to 6 hours. *E. coli* cfu counts were used to  
872 determine bacterial survival in the presence of *T. vaginalis* expressing mutant  
873 (triangles) or WT (circles) NlpC\_A1. The inset figure illustrates the growth of *E. coli*  
874 when co-incubated with each of the *T. vaginalis* transfectants and at each time point,  
875 as indicated. Undiluted mixed cultures were individually spotted on a LB-agar plate.  
876 The values are mean  $\pm$  SD of three independent experiments.

877

878 **Fig 7. *T. vaginalis* over-expressing NlpC\_A1 is partially impaired on clearing up**  
879 **a pentapeptide-rich peptidoglycan bacteria from mixed cultures.** *T. vaginalis* was  
880 stably transfected with plasmids expressing no NlpC\_A1 protein (Empty) and HA-  
881 tagged NlpC\_A1 wild-type (NlpC\_A1). *E. coli*, strains DH5 $\alpha$  and CS703-1, were  
882 incubated alone or in the presence of each of the transfected *T. vaginalis* at a ratio of  
883 four bacteria to one protozoan cell for one hour. **Left.** To illustrate the bacterial growth  
884 inhibitory effect of *T. vaginalis* Empty versus WT against these strains of *E. coli*,  
885 undiluted mixed cultures were plated on LB-agar. **Right.** To measure the levels of

886 bacterial survival, dilutions of the mixed cultures were plated on LB-agar and cfu  
887 counts were obtained. For each *E. coli* strain (DH5 $\alpha$  and CS703-1), cfu counts were  
888 used to calculate bacterial survival in the presence of the Empty *T. vaginalis* (white  
889 bar) or *T. vaginalis* expressing NlpC\_A1 wild-type (grey bar).

890

891 **S1 Fig. Sequence comparison of *T. vaginalis* NlpC/P60 proteins.** (A) Multiple  
892 sequence alignment of *T. vaginalis* NlpC/P60 proteins with selected homologues. The  
893 alignment is focused on the conserved NlpC/P60 domain. The positions of residues  
894 for the protein encoded by TVAG\_119910 are indicated at the beginning of each block  
895 of the alignment. The residues of the catalytic Cys-His-His triad are boxed showing  
896 complete conservation among aligned sequences. The position of indels (dashes) for  
897 the four *T. vaginalis* sequences from clan A are distinct from the five sequences from  
898 clan B and are also differentially shared with the sequences from the phage infecting  
899 *Clostridium difficile* (accession YP\_009217650.1) and three bacteria (*Drancourtella* sp.  
900 accession WP\_087169682.1; *Streptosporangium canum*, accession SFL23765.1 and  
901 *Clostridium bifermentans*, accession EQK42778.1) that are also clustering in the  
902 phylogenetic tree with respectively *T. vaginalis* sequences from clan A and clan B (see  
903 Fig 1). This further supports two distinct LGT events into the *Trichomonas* lineage for  
904 these NlpC/P60 encoding genes, which were followed by gene duplications events  
905 leading to a total of nine TvNlpC/P60 genes. (B) Comparison of the structural  
906 organisation of the nine *T. vaginalis* NlpC/P60 and the other six eukaryotic NlpC/P60  
907 proteins included in the phylogenetic analyses (Fig 1C, S1 table).

908

909 **S2 Fig. Small angle X-ray scattering analysis of NlpC\_A1 and NlpC\_A2.** Scattering  
910 data for (A) NlpC\_A1 and (B) NlpC\_A2. A dilution series was collected for each protein  
911 and shows no concentration dependence in the scattering profile. Guinier analysis for  
912 each concentration is shown inset. The pair-distribution function  $p(r)$  for (C) NlpC\_A1

913 and **(D)** NlpC\_A2. Comparison of the observed scattering profile with the theoretical  
914 scattering from the structure of **(E)** NlpC\_A1 and **(F)** NlpC\_A2.

915

916 **S3 Fig. Mutant NlpC proteins are inactive against *E. coli* PG.** HPLC  
917 chromatograms from peptidoglycan cleavage assays with NlpC mutant proteins (10  
918  $\mu$ M) and control (no enzyme) are indicated. Peaks were assigned by comparison with  
919 published literature. No detectable activity was observed for any of the mutant proteins.

920

921 **S4 Fig. Cell fractionation indicates that the HA-tagged NlpC\_A1 is on the**  
922 **membrane of *T. vaginalis*.** Cells transfected with a plasmid expressing the HA-tagged  
923 NlpC\_A1 were incubated in a hypo-osmotic buffer and broken up by mechanic lysis  
924 and cellular fractions were obtained by differential centrifugation (see Methods). Cell  
925 fractions were obtained as T (total, i.e. whole cell with no fractionation), O (organelles,  
926 including nuclei), C (cytosol) and M (membrane). Samples were loaded on SDS-PAGE  
927 gels at equivalent volumes, along with a molecular weight marker (MW), for coomassie  
928 staining (first panel) and Western blots. Western blots were probed with the primary  
929 antibodies anti-HA (second panel) and anti-ferredoxin (third panel), as indicated. The  
930 primary anti-ferredoxin (anti-Fd) detects the hydrogenosomal ferredoxin (a clear  
931 indicator of an organellar fraction for *T. vaginalis* cell fractionation) and it was kindly  
932 provided by Patricia Johnson (UCLA). Secondary antibodies conjugated with  
933 horseradish peroxidase were used for chemiluminescent detection. HA-tagged  
934 NlpC\_A1 is found in fraction M, indicating membrane localization. This fraction is clean  
935 from unbroken cells since no signal with anti-ferredoxin antibody can be detected.  
936 However, fraction O still carries signal for HA-tagged NlpC\_A1 which may come from  
937 intact cells carried over to this fraction due to partial cell lysis.

938

939 **S5 Fig. *T. vaginalis* virtually eliminates *E. coli* from mixed cultures when over-**  
940 **expressing NlpC\_A1.** *E. coli* DH5 $\alpha$  was incubated with NlpC\_A1-transfected *T.*  
941 *vaginalis* or with non-transfected *T. vaginalis* G3, as indicated, at a cell ratio of 1:10  
942 (bacteria:protozoan) for 1, 2, 4 and 6 hours. While *E. coli* thrived with non-transfected  
943 G3 throughout the course of the experiment, these bacteria were virtually eliminated  
944 with transfected *T. vaginalis* over-expressing NlpC\_A1 in the first hour or co-  
945 incubation.

946

947 **S6 Fig. GC% plot for the nine scaffolds encoding the TvNlpC/P60 proteins.** For  
948 each scaffold the graph of (i) the negative z'-score and the (ii) GC% composition of  
949 each segments are shown. Blue dots correspond to the start and stop codons for the  
950 ORF encoding the TvNlpC/P60 protein. The green square(s) indicate the position of  
951 the inferred segmentation points between major GC% transitions when present. All  
952 GC% values for identified segments are shown on each graph and these are  
953 also listed in S1 Table. The individual scaffolds were analysed with the following  
954 settings following the instructions provided at the GC-profile server:

955 Settings 1: GC\_plots\_TVAG\_042760\_DS113937\_2 --- 43,359 bp;

956 GC\_plots\_TVAG\_411960\_DS113699\_2 --- 63,570 bp with Halting parameter

957 = 10.00 and Minimum length = 100 bp. Settings 2:

958 GC\_plots\_TVAG\_252970\_DS113529\_2 --- 84,867 bp;

959 GC\_plots\_TVAG\_324990\_DS113569\_2 --- 79,056 bp with Halting parameter

960 = 50.00 and Minimum length = 100 bp. Settings 3:

961 GC\_plots\_TVAG\_051010\_DS113369\_2 --- 122,255 bp;

962 GC\_plots\_TVAG\_119910\_DS113177\_2 --- 584,929 bp;

963 GC\_plots\_TVAG\_209010\_DS113253\_2 --- 190,068 bp;

964 GC\_plots\_TVAG\_393610\_DS113268\_2 --- 177,036 bp;

965 GC\_plots\_TVAG\_457240\_DS113186\_2 --- 405,446 bp; with Halting

966 parameter = 50.00 and Minimum length = 1000 bp.

967

968 **S7 Fig. The bacteriolytic effect of the purified recombinant NlpC\_A1 enzyme and**

969 **lysozyme on *E. coli* DH5 $\alpha$ .** Bacteria ( $5 \times 10^5$  cell/ml) were incubated with increasing

970 concentrations of the purified recombinant NlpC\_A1 wild-type (blue line) and C179S

971 mutant (orange line) in [10 mM Tris-HCl pH 7.5, 100 mM NaCl and 1 mM EDTA] at 37

972 °C for 1 hour. As a positive control, bacteria were incubated with lysozyme (black line)

973 at the same concentrations: 12.5, 25, 50 and 100  $\mu$ M. As a negative control, bacteria

974 were incubated with buffer only (no enzyme). Following incubation, bacteria were

975 plated on LB-agar with appropriate dilution for cfu counting. Reduction on cfu was

976 calculated as a percentage in comparison to the mock treatment (negative control).

977 While lysozyme promotes cfu reduction due to its known bactericidal activity, purified

978 NlpC\_A1 even at the highest concentration does not have any effect. Therefore, *T.*

979 *vaginalis* NlpC\_A1 is not bacteriolytic.

980

981 **S8 Fig. Treefile used for the Approximate Unbiased (AU) topological test.** The

982 text file lists the eight trees (in NEWICK format) used for the AU topological test. The

983 results of the AU test and tree descriptions are listed in S5 Table.

984

985 **S1 Table. Overview of *T. vaginalis* NlpC/P60 genes, gene expression data and**

986 **protein features.** TvNlpC/P60 genes/proteins were sorted by clusters A (in blue) and

987 B (in green).

988

989 **S2 Table. Taxonomic BlastP report for query NlpC\_A1/TVAG\_119910/**

990 **XP\_001276902 against the NCBI nr protein database.**

991

992 **S3 Table. Taxonomic BlastP report for query NlpC\_B1/TVAG\_393610/**  
993 **XP\_001326856 against the NCBI nr protein database.**

994

995 **S4 Table. Taxonomic DELTA-Blast report for query NlpC\_A1/TVAG\_119910/**  
996 **XP\_001276902 against the NCBI nr protein database restricted to eukaryotes.**

997

998 **S5 Table. Approximate Unbiased (AU) tree topological test for hypotheses of**  
999 **TvNlpC/P60 phylogenetic relationships.** Tree topologies derived from  
1000 unconstrained analyses using different amino acid evolutionary models were tested  
1001 against each other and against tree topologies derived from four constrained analyses  
1002 testing specific relationships for the TvNlpC/P60 entries, as described in the main text.

1003

1004 **S6 Table. Data collection and refinement statistics.** Values in parenthesis  
1005 represent the highest resolution shell.

1006

1007 **S7 Table. Small-angle X-ray scattering data analysis.**

1008

## 1009 **References**

- 1010 1. WHO. Global health sector strategy on sexually transmitted infections 2016–  
1011 2021 [Internet]. Who. World Health Organization; 2016. Available:  
1012 <http://www.who.int/reproductivehealth/publications/rtis/ghss-stis/en/>
- 1013 2. Swygard H, Seña AC, Hobbs MM, Cohen MS. Trichomoniasis: clinical  
1014 manifestations, diagnosis and management. *Sex Transm Infect.* 2004;80: 91–  
1015 95. doi:10.1136/sti.2003.005124
- 1016 3. Cotch MF, Pastorek JG, Nugent RP, Hillier SL, Gibbs RS, Martin DH, et al.  
1017 *Trichomonas vaginalis* associated with low birth weight and preterm delivery.  
1018 *Sex Transm Dis.* 1997;24: 353–360. doi:10.1097/00007435-199707000-00008
- 1019 4. Hardy P, Nell EE, Spence M, Hardy J, Graham D, Rosenbaum R. Prevalence

- 1020 of Six Sexually Transmitted Disease Agents Among Pregnant Inner-City  
1021 Adolescents and Pregnancy Outcome. *Lancet*. 1984;324: 333–337.  
1022 doi:10.1016/S0140-6736(84)92698-9
- 1023 5. Minkoff H, Grunebaum AN, Schwarz RH, Feldman J, Cummings M,  
1024 Crombleholme W, et al. Risk factors for prematurity and premature rupture of  
1025 membranes: A prospective study of the vaginal flora in pregnancy. *Am J Obstet*  
1026 *Gynecol*. Mosby; 1984;150: 965–972. doi:10.1016/0002-9378(84)90392-2
- 1027 6. Gram IT, Macaluso M, Churchill J, Stalsberg H. *Trichomonas vaginalis* (TV) and  
1028 human papillomavirus (HPV) infection and the incidence of cervical  
1029 intraepithelial neoplasia (CIN) grade III. *Cancer Causes Control*. 1992;3: 231–  
1030 6. doi:10.1007/BF00124256.
- 1031 7. Stark JR, Judson G, Alderete JF, Mundodi V, Kucknoor AS, Giovannucci EL, et  
1032 al. Prospective study of *trichomonas vaginalis* infection and prostate cancer  
1033 incidence and mortality: Physicians' health study. *J Natl Cancer Inst*. 2009;101:  
1034 1406–1411. doi:10.1093/jnci/djp306
- 1035 8. Laga M, Manoka A, Kivuvu M, Malele B, Tuliza M, Nzila N, et al. Non-ulcerative  
1036 sexually transmitted diseases as risk factors for HIV-1 transmission in women:  
1037 results from a cohort study. *AIDS*. 1993;7: 95–102.
- 1038 9. Fichorova RN, Buck OR, Yamamoto HS, Fashemi T, Dawood HY, Fashemi B,  
1039 et al. The villain team-up or how *Trichomonas vaginalis* and bacterial vaginosis  
1040 alter innate immunity in concert. *Sex Transm Infect*. 2013;89: 460–466.  
1041 doi:10.1136/sextrans-2013-051052
- 1042 10. Phukan N, Parsamand T, Brooks AES, Nguyen TNM, Simoes-Barbosa A. The  
1043 adherence of *Trichomonas vaginalis* to host ectocervical cells is influenced by  
1044 lactobacilli. *Sex Transm Infect*. 2013;89: 455–459. doi:10.1136/sextrans-2013-  
1045 051039
- 1046 11. Bär A-K, Phukan N, Pinheiro J, Simoes-Barbosa A. The Interplay of Host  
1047 Microbiota and Parasitic Protozoans at Mucosal Interfaces: Implications for the



- 1048 Outcomes of Infections and Diseases. PLoS Negl Trop Dis. 2015;9: e0004176.  
1049 doi:10.1371/journal.pntd.0004176
- 1050 12. Brotman RM, Bradford LL, Conrad M, Gajer P, Aul K, Peralta L, et al.  
1051 Association between *Trichomonas vaginalis* and vaginal bacterial community  
1052 composition among reproductive-age women. Sex Transm Dis. 2012;39: 807–  
1053 812. doi:10.1097/OLQ.0b013e3182631c79
- 1054 13. Maritz JM, Land KM, Carlton JM, Hirt RP. What is the importance of zoonotic  
1055 trichomonads for human health? Trends Parasitol. 2014;30: 333–341.  
1056 doi:10.1016/j.pt.2014.05.005
- 1057 14. Carlton JM, Hirt RP, Silva JC, Delcher AL, Schatz M, Zhao Q, et al. Draft  
1058 Genome Sequence of the Sexually Transmitted Pathogen *Trichomonas*  
1059 *vaginalis*. Science (80- ). 2007;315: 207–212. doi:10.1126/science.1132894
- 1060 15. Hirt RP, Alsmark C, Embley TM. Lateral gene transfers and the origins of the  
1061 eukaryote proteome: a view from microbial parasites. Curr Opin Microbiol.  
1062 2015;23: 155–162. doi:10.1016/j.mib.2014.11.018
- 1063 16. Huang K, Chen Y-YM, Fang Y, Cheng W-H, Cheng C, Chen Y-C, et al. Adaptive  
1064 responses to glucose restriction enhance cell survival, antioxidant capability,  
1065 and autophagy of the protozoan parasite *Trichomonas vaginalis*. Biochim  
1066 Biophys Acta - Gen Subj. 2014;1840: 53–64. doi:10.1016/j.bbagen.2013.08.008
- 1067 17. Gould SB, Woehle C, Kusdian G, Landan G, Tachezy J, Zimorski V, et al. Deep  
1068 sequencing of *Trichomonas vaginalis* during the early infection of vaginal  
1069 epithelial cells and amoeboid transition. Int J Parasitol. Australian Society for  
1070 Parasitology Inc.; 2013;43: 707–719. doi:10.1016/j.ijpara.2013.04.002
- 1071 18. Alsmark C, Foster PG, Sicheritz-Ponten T, Nakjang S, Martin Embley T, Hirt  
1072 RP. Patterns of prokaryotic lateral gene transfers affecting parasitic microbial  
1073 eukaryotes. Genome Biol. 2013;14: R19. doi:10.1186/gb-2013-14-2-r19
- 1074 19. Nikoh N, McCutcheon JP, Kudo T, Miyagishima SY, Moran NA, Nakabachi A.  
1075 Bacterial genes in the aphid genome: Absence of functional gene transfer from

- 1076 Buchnera to its host. PLoS Genet. 2010;6: e1000827.  
1077 doi:10.1371/journal.pgen.1000827
- 1078 20. Schönknecht G, Weber APM, Lercher MJ. Horizontal gene acquisitions by  
1079 eukaryotes as drivers of adaptive evolution. BioEssays. 2014;36: 9–20.  
1080 doi:10.1002/bies.201300095
- 1081 21. Soucy SM, Huang J, Gogarten JP. Horizontal gene transfer: building the web of  
1082 life. Nat Rev Genet. 2015;16: 472–482. doi:10.1038/nrg3962
- 1083 22. Husnik F, McCutcheon JP. Functional horizontal gene transfer from bacteria to  
1084 eukaryotes. Nat Rev Microbiol. 2017;16: 67–79. doi:10.1038/nrmicro.2017.137
- 1085 23. Gladyshev EA, Meselson M, Arkhipova IR. Massive Horizontal Gene Transfer  
1086 in Bdelloid Rotifers. Science (80- ). 2008;320: 1210–1213.  
1087 doi:10.1126/science.1156407
- 1088 24. Nikoh N, Nakabachi A. Aphids acquired symbiotic genes via lateral gene  
1089 transfer. BMC Biol. 2009;7: 12. doi:10.1186/1741-7007-7-12
- 1090 25. Metcalf JA, Funkhouser-Jones LJ, Briley K, Reysenbach A, Bordenstein SR.  
1091 Antibacterial gene transfer across the tree of life. Elife. 2014;3: 1–18.  
1092 doi:10.7554/eLife.04266
- 1093 26. Chou S, Daugherty MD, Peterson SB, Biboy J, Yang Y, Jutras BL, et al.  
1094 Transferred interbacterial antagonism genes augment eukaryotic innate  
1095 immune function. Nature. 2015;518: 98–101. doi:10.1038/nature13965
- 1096 27. Ohnishi R, Ishikawa S, Sekiguchi J. Peptidoglycan hydrolase LytF plays a role  
1097 in cell separation with CwIF during vegetative growth of *Bacillus subtilis*. J  
1098 Bacteriol. 1999;181: 3178–3184. Available:  
1099 <http://www.ncbi.nlm.nih.gov/pubmed/10322020>
- 1100 28. Anantharaman V, Aravind L. Evolutionary history, structural features and  
1101 biochemical diversity of the NlpC/P60 superfamily of enzymes. Genome Biol.  
1102 2003;4: R11. doi:10.1186/gb-2003-4-2-r11
- 1103 29. Aurrecochea C, Brestelli J, Brunk BP, Carlton JM, Dommer J, Fischer S, et al.

- 1104 GiardiaDB and TrichDB: integrated genomic resources for the eukaryotic protist  
1105 pathogens *Giardia lamblia* and *Trichomonas vaginalis*. *Nucleic Acids Res.*  
1106 2009;37: D526–D530. doi:10.1093/nar/gkn631
- 1107 30. Dyrlov Bendtsen J, Nielsen H, von Heijne G, Brunak S. Improved Prediction of  
1108 Signal Peptides: SignalP 3.0. *J Mol Biol.* 2004;340: 783–795.  
1109 doi:10.1016/J.JMB.2004.05.028
- 1110 31. Rancurel C, Legrand L, Danchin EGJ. Alieness: Rapid detection of candidate  
1111 horizontal gene transfers across the tree of life. *Genes (Basel).* 2017;8.  
1112 doi:10.3390/genes8100248
- 1113 32. Benchimol M, de Almeida LGP, Vasconcelos AT, de Andrade Rosa I, Reis Bogo  
1114 M, Kist LW, et al. Draft Genome Sequence of *Trichomonas foetus* Strain K.  
1115 *Genome Announc.* 2017;5: e00195-17. doi:10.1128/genomeA.00195-17
- 1116 33. Brown CT, Hug LA, Thomas BC, Sharon I, Castelle CJ, Singh A, et al. Unusual  
1117 biology across a group comprising more than 15% of domain Bacteria. *Nature.*  
1118 2015;523: 208–211. doi:10.1038/nature14486
- 1119 34. Clarke M, Lohan AJ, Liu B, Lagkouvardos I, Roy S, Zafar N, et al. Genome of  
1120 *Acanthamoeba castellanii* highlights extensive lateral gene transfer and early  
1121 evolution of tyrosine kinase signaling. *Genome Biol.* 2013;14: R11.  
1122 doi:10.1186/gb-2013-14-2-r11
- 1123 35. Tang VH, Stewart GA, Chang BJ. *Dermatophagoides pteronyssinus* *lytFM*  
1124 encoding an NlpC/P60 endopeptidase is also present in mite-associated  
1125 bacteria that express *LytFM* variants. *FEBS Open Bio.* 2017;7: 1267–1280.  
1126 doi:10.1002/2211-5463.12263
- 1127 36. Strese Å, Backlund A, Alsmark C. A recently transferred cluster of bacterial  
1128 genes in *Trichomonas vaginalis* - lateral gene transfer and the fate of acquired  
1129 genes. *BMC Evol Biol.* 2014;14: 119. doi:10.1186/1471-2148-14-119
- 1130 37. Drenth J, Jansonius JN, Koekoek R, Swen HM, Wolthers BG. Structure of  
1131 Papain. *Nature.* 1968;218: 929–932. doi:10.1038/218929a0

- 1132 38. Typas A, Banzhaf M, Gross CA, Vollmer W. From the regulation of  
1133 peptidoglycan synthesis to bacterial growth and morphology. *Nat Rev Microbiol.*  
1134 2011;10: 123–136. doi:10.1038/nrmicro2677
- 1135 39. Baker NA, Sept D, Joseph S, Holst MJ, McCammon JA. Electrostatics of  
1136 nanosystems: Application to microtubules and the ribosome. *Proc Natl Acad*  
1137 *Sci.* 2001;98: 10037–10041. doi:10.1073/pnas.181342398
- 1138 40. Wong JEMM, Midtgaard SR, Gysel K, Thygesen MB, Sørensen KK, Jensen KJ,  
1139 et al. An intermolecular binding mechanism involving multiple LysM domains  
1140 mediates carbohydrate recognition by an endopeptidase. *Acta Crystallogr Sect*  
1141 *D Biol Crystallogr.* 2015;71: 592–605. doi:10.1107/S139900471402793X
- 1142 41. Krissinel E, Henrick K. Secondary-structure matching (SSM), a new tool for fast  
1143 protein structure alignment in three dimensions. *Acta Crystallogr Sect D Biol*  
1144 *Crystallogr.* 2004;60: 2256–2268. doi:10.1107/S0907444904026460
- 1145 42. Xu Q, Abdubek P, Astakhova T, Axelrod HL, Bakolitsa C, Cai X, et al. Structure  
1146 of the  $\gamma$ -D -glutamyl- L -diamino acid endopeptidase YkfC from *Bacillus cereus*  
1147 in complex with L -Al. *Acta Crystallogr Sect F Struct Biol Cryst Commun.*  
1148 2010;66: 1354–1364. doi:10.1107/S1744309110021214
- 1149 43. Casadaban MJ, Cohen SN. Analysis of gene control signals by DNA fusion and  
1150 cloning in *Escherichia coli*. *J Mol Biol.* 1980;138: 179–207. doi:10.1016/0022-  
1151 2836(80)90283-1
- 1152 44. Meberg BM, Sailer FC, Nelson DE, Young KD. Reconstruction of *Escherichia*  
1153 *coli mrcA* (PBP 1a) Mutants Lacking Multiple Combinations of Penicillin Binding  
1154 Proteins. *J Bacteriol.* 2001;183: 6148–6149. doi:10.1128/JB.183.20.6148-  
1155 6149.2001
- 1156 45. Lawrence JG, Ochman H. Amelioration of Bacterial Genomes: Rates of Change  
1157 and Exchange. *J Mol Evol.* 1997;44: 383–397. doi:10.1007/PL00006158
- 1158 46. Bertsche U, Breukink E, Kast T, Vollmer W. In Vitro Murein (Peptidoglycan)  
1159 Synthesis by Dimers of the Bifunctional Transglycosylase-Transpeptidase

- 1160 PBP1B from *Escherichia coli*. *J Biol Chem*. 2005;280: 38096–38101.  
1161 doi:10.1074/jbc.M508646200
- 1162 47. Vollmer W, Joris B, Charlier P, Foster S. Bacterial peptidoglycan (murein)  
1163 hydrolases. *FEMS Microbiol Rev*. 2008;32: 259–286. doi:10.1111/j.1574-  
1164 6976.2007.00099.x
- 1165 48. de Miguel N, Lustig G, Twu O, Chattopadhyay A, Wohlschlegel JA, Johnson PJ.  
1166 Proteome Analysis of the Surface of *Trichomonas vaginalis* Reveals Novel  
1167 Proteins and Strain-dependent Differential Expression. *Mol Cell Proteomics*.  
1168 2010;9: 1554–1566. doi:10.1074/mcp.M000022-MCP201
- 1169 49. Huang K-Y, Huang P-J, Ku F-M, Lin R, Alderete JF, Tang P. Comparative  
1170 Transcriptomic and Proteomic Analyses of *Trichomonas vaginalis* following  
1171 Adherence to Fibronectin. *Infect Immun*. 2012;80: 3900–3911.  
1172 doi:10.1128/IAI.00611-12
- 1173 50. Twu O, de Miguel N, Lustig G, Stevens GC, Vashisht AA, Wohlschlegel JA, et  
1174 al. *Trichomonas vaginalis* Exosomes Deliver Cargo to Host Cells and Mediate  
1175 Host:Parasite Interactions. Petri WA, editor. *PLoS Pathog*. 2013;9: e1003482.  
1176 doi:10.1371/journal.ppat.1003482
- 1177 51. Ragland SA, Criss AK. From bacterial killing to immune modulation: Recent  
1178 insights into the functions of lysozyme. Bliska JB, editor. *PLOS Pathog*.  
1179 2017;13: e1006512. doi:10.1371/journal.ppat.1006512
- 1180 52. Bard E, Laibe S, Bettinger D, Riethmuller D, Biichlé S, Seilles E, et al. New  
1181 Sensitive Method for the Measurement of Lysozyme and Lactoferrin for the  
1182 Assessment of Innate Mucosal Immunity. Part I: Time-Resolved  
1183 Immunofluorometric Assay in Serum and Mucosal Secretions. *Clin Chem Lab*  
1184 *Med*. 2003;41: 127–133. doi:10.1515/CCLM.2003.021
- 1185 53. Chou S, Bui NK, Russell AB, Lexa KW, Gardiner TE, LeRoux M, et al. Structure  
1186 of a Peptidoglycan Amidase Effector Targeted to Gram-Negative Bacteria by

- 1187 the Type VI Secretion System. *Cell Rep.* 2012;1: 656–664.  
1188 doi:10.1016/j.celrep.2012.05.016
- 1189 54. Pazos M, Peters K, Vollmer W. Robust peptidoglycan growth by dynamic and  
1190 variable multi-protein complexes. *Curr Opin Microbiol.* 2017;36: 55–61.  
1191 doi:10.1016/j.mib.2017.01.006
- 1192 55. Wolf AJ, Underhill DM. Peptidoglycan recognition by the innate immune system.  
1193 *Nat Rev Immunol.* 2018;18: 243–254. doi:10.1038/nri.2017.136
- 1194 56. Chu H, Mazmanian SK. Innate immune recognition of the microbiota promotes  
1195 host-microbial symbiosis. *Nat Immunol.* 2013;14: 668–75. doi:10.1038/ni.2635
- 1196 57. Fichorova R, Fraga J, Rappelli P, Fiori PL. *Trichomonas vaginalis* infection in  
1197 symbiosis with *Trichomonasvirus* and *Mycoplasma*. *Res Microbiol.* 2017;168:  
1198 882–891. doi:10.1016/J.RESMIC.2017.03.005
- 1199 58. Finn RD, Attwood TK, Babbitt PC, Bateman A, Bork P, Bridge AJ, et al. InterPro  
1200 in 2017-beyond protein family and domain annotations. *Nucleic Acids Res.*  
1201 2017;45: D190–D199. doi:10.1093/nar/gkw1107
- 1202 59. Käll L, Krogh A, Sonnhammer ELL. Advantages of combined transmembrane  
1203 topology and signal peptide prediction-the Phobius web server. *Nucleic Acids*  
1204 *Res.* 2007;35: W429–W432. doi:10.1093/nar/gkm256
- 1205 60. Nielsen H. Predicting Secretory Proteins with SignalP. *Protein Function*  
1206 *Prediction Methods in Molecular Biology.* 2017. pp. 59–73. doi:10.1007/978-1-  
1207 4939-7015-5\_6
- 1208 61. Viklund H, Bernsel A, Skwark M, Elofsson A. SPOCTOPUS: A combined  
1209 predictor of signal peptides and membrane protein topology. *Bioinformatics.*  
1210 2008;24: 2928–2929. doi:10.1093/bioinformatics/btn550
- 1211 62. Capella-Gutierrez S, Silla-Martinez JM, Gabaldon T. trimAl: a tool for automated  
1212 alignment trimming in large-scale phylogenetic analyses. *Bioinformatics.*  
1213 2009;25: 1972–1973. doi:10.1093/bioinformatics/btp348
- 1214 63. Lefort V, Longueville J, Gascuel O. SMS: Smart Model Selection in PhyML. *Mol*

- 1215 Biol Evol. 2017;34: 2422–2424. doi:10.1093/molbev/msx149
- 1216 64. Le SQ, Dang CC, Gascuel O. Modeling protein evolution with several amino  
1217 acid replacement matrices depending on site rates. Mol Biol Evol. 2012;29:  
1218 2921–2936. doi:10.1093/molbev/mss112
- 1219 65. Quang LS, Gascuel O, Lartillot N. Empirical profile mixture models for  
1220 phylogenetic reconstruction. Bioinformatics. 2008;24: 2317–2323.  
1221 doi:10.1093/bioinformatics/btn445
- 1222 66. Guindon S, Dufayard J-F, Lefort V, Anisimova M, Hordijk W, Gascuel O. New  
1223 Algorithms and Methods to Estimate Maximum-Likelihood Phylogenies:  
1224 Assessing the Performance of PhyML 3.0. Syst Biol. 2010;59: 307–321.  
1225 doi:10.1093/sysbio/syq010
- 1226 67. Gouy M, Guindon S, Gascuel O. SeaView Version 4: A Multiplatform Graphical  
1227 User Interface for Sequence Alignment and Phylogenetic Tree Building. Mol Biol  
1228 Evol. 2010;27: 221–224. doi:10.1093/molbev/msp259
- 1229 68. Nguyen LT, Schmidt HA, Von Haeseler A, Minh BQ. IQ-TREE: A fast and  
1230 effective stochastic algorithm for estimating maximum-likelihood phylogenies.  
1231 Mol Biol Evol. 2015;32: 268–274. doi:10.1093/molbev/msu300
- 1232 69. Trifinopoulos J, Nguyen LT, von Haeseler A, Minh BQ. W-IQ-TREE: a fast online  
1233 phylogenetic tool for maximum likelihood analysis. Nucleic Acids Res. 2016;44:  
1234 W232–W235. doi:10.1093/nar/gkw256
- 1235 70. Shimodaira H. An approximately unbiased test of phylogenetic tree selection.  
1236 Syst Biol. 2002;51: 492–508. doi:10.1080/10635150290069913
- 1237 71. Letunic I, Bork P. Interactive tree of life (iTOL) v3: an online tool for the display  
1238 and annotation of phylogenetic and other trees. Nucleic Acids Res. 2016;44:  
1239 W242–W245. doi:10.1093/nar/gkw290
- 1240 72. Gao F, Zhang CT. GC-Profile: A web-based tool for visualizing and analyzing  
1241 the variation of GC content in genomic sequences. Nucleic Acids Res. 2006;34:  
1242 686–691. doi:10.1093/nar/gkl040

- 1243 73. Puigbò P, Bravo IG, Garcia-Vallve S. CAIcal: A combined set of tools to assess  
1244 codon usage adaptation. *Biol Direct*. 2008;3: 1–8. doi:10.1186/1745-6150-3-38
- 1245 74. Clark CG, Diamond LS. Methods for Cultivation of Luminal Parasitic Protists of  
1246 Clinical Importance. *Clin Microbiol Rev*. 2002;15: 329–341.  
1247 doi:10.1128/CMR.15.3.329-341.2002
- 1248 75. Brooks AES, Parsamand T, Kelly RW, Simoes-Barbosa A. An improved  
1249 quantitative method to assess adhesive properties of *Trichomonas vaginalis* to  
1250 host vaginal ectocervical cells using flow cytometry. *J Microbiol Methods*.  
1251 2013;92: 73–78. doi:10.1016/j.mimet.2012.10.011
- 1252 76. Pfaffl MW. Relative expression software tool (REST(C)) for group-wise  
1253 comparison and statistical analysis of relative expression results in real-time  
1254 PCR. *Nucleic Acids Res*. 2002;30: 36e–36. doi:10.1093/nar/30.9.e36
- 1255 77. Delgadillo MG, Liston DR, Niazi K, Johnson PJ. Transient and selectable  
1256 transformation of the parasitic protist *Trichomonas vaginalis*. *Proc Natl Acad*  
1257 *Sci*. 1997;94: 4716–4720. doi:10.1073/pnas.94.9.4716
- 1258 78. Aslanidis C, de Jong PJ. Ligation-independent cloning of PCR products (LIC-  
1259 PCR). *Nucleic Acids Res*. 1990;18: 6069–6074. doi:10.1093/nar/18.20.6069
- 1260 79. Studier FW. Protein production by auto-induction in high-density shaking  
1261 cultures. *Protein Expr Purif*. 2005;41: 207–234. doi:10.1016/j.pep.2005.01.016
- 1262 80. Gorrec F. The MORPHEUS protein crystallization screen. *J Appl Crystallogr*.  
1263 *International Union of Crystallography*; 2009;42: 1035–1042.  
1264 doi:10.1107/S0021889809042022
- 1265 81. Moreland N, Ashton R, Baker HM, Ivanovic I, Patterson S, Arcus VL, et al. A  
1266 flexible and economical medium-throughput strategy for protein production and  
1267 crystallization. *Acta Crystallogr Sect D Biol Crystallogr*. 2005;61: 1378–1385.  
1268 doi:10.1107/S0907444905023590
- 1269 82. Sheldrick GM. Experimental phasing with SHELXC / D / E : combining chain  
1270 tracing with density modification. *Acta Crystallogr Sect D Biol Crystallogr*.



- 1271 International Union of Crystallography; 2010;66: 479–485.  
1272 doi:10.1107/S0907444909038360
- 1273 83. Potterton E, Briggs P, Turkenburg M, Dodson E. A graphical user interface to  
1274 the CCP4 program suite. *Acta Crystallogr Sect D Biol Crystallogr.* 2003;59:  
1275 1131–1137. doi:10.1107/S0907444903008126
- 1276 84. Adams PD, Baker D, Brunger AT, Das R, DiMaio F, Read RJ, et al. Advances,  
1277 Interactions, and Future Developments in the CNS, Phenix, and Rosetta  
1278 Structural Biology Software Systems. *Annu Rev Biophys.* 2013;42: 265–287.  
1279 doi:10.1146/annurev-biophys-083012-130253
- 1280 85. Emsley P, Lohkamp B, Scott WG, Cowtan K. Features and development of  
1281 Coot. *Acta Crystallogr Sect D Biol Crystallogr.* 2010;66: 486–501.  
1282 doi:10.1107/S0907444910007493
- 1283 86. McCoy AJ. Solving structures of protein complexes by molecular replacement  
1284 with Phaser. *Acta Crystallographica Section D: Biological Crystallography.*  
1285 2006. pp. 32–41. doi:10.1107/S0907444906045975
- 1286 87. Bui NK, Gray J, Schwarz H, Schumann P, Blanot D, Vollmer W. The  
1287 peptidoglycan sacculus of *Myxococcus xanthus* has unusual structural features  
1288 and is degraded during glycerol-induced myxospore development. *J Bacteriol.*  
1289 2009;191: 494–505. doi:10.1128/JB.00608-08
- 1290 88. Russell AB, Singh P, Brittnacher M, Bui NK, Hood RD, Carl MA, et al. A  
1291 Widespread Bacterial Type VI Secretion Effector Superfamily Identified Using a  
1292 Heuristic Approach. *Cell Host Microbe.* 2012;11: 538–549.  
1293 doi:10.1016/j.chom.2012.04.007
- 1294 89. Yu Z, Huang Z, Lung M. Subcellular Fractionation of Cultured Human Cell Lines.  
1295 *Bio-Protocol.* 2013;3. doi:10.21769/BioProtoc.754  
1296

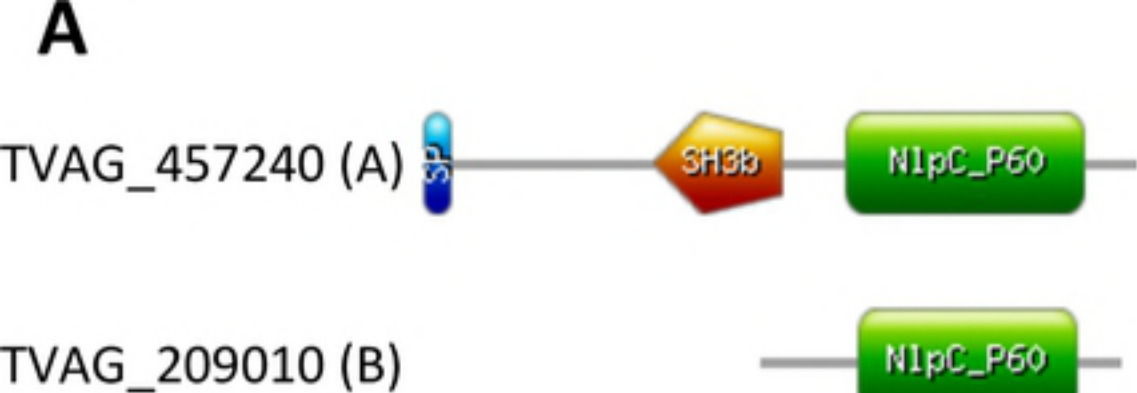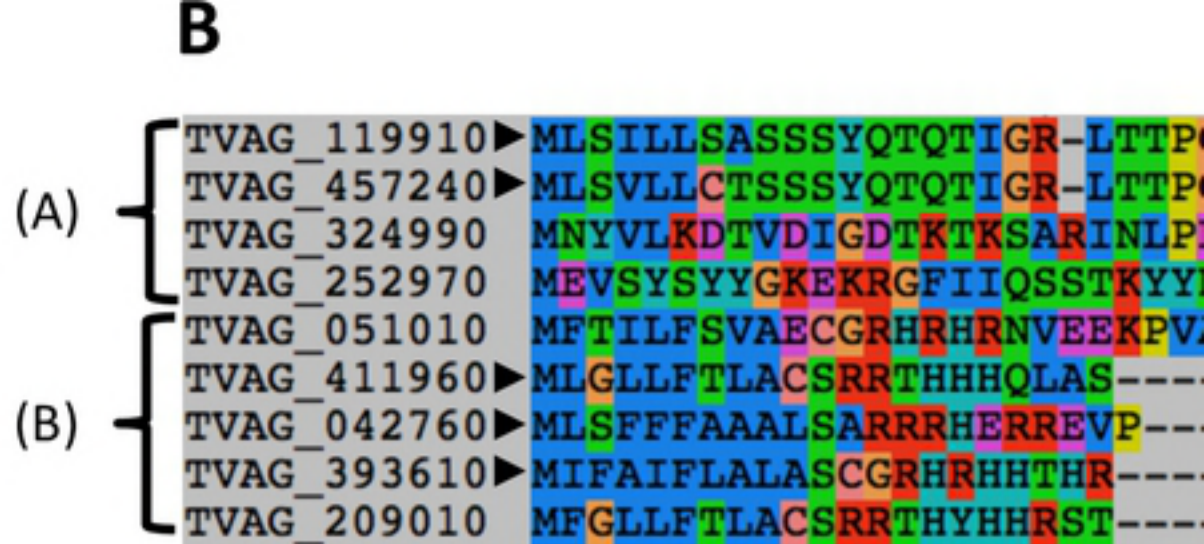

**C**

Tree scale: 0.1

bioRxiv preprint doi: <https://doi.org/10.1101/320382>; this version posted May 11, 2018. The copyright holder for this preprint (which was not certified by peer review) is the author/funder, who has granted bioRxiv a license to display the preprint in perpetuity. It is made available under aCC-BY 4.0 International license.

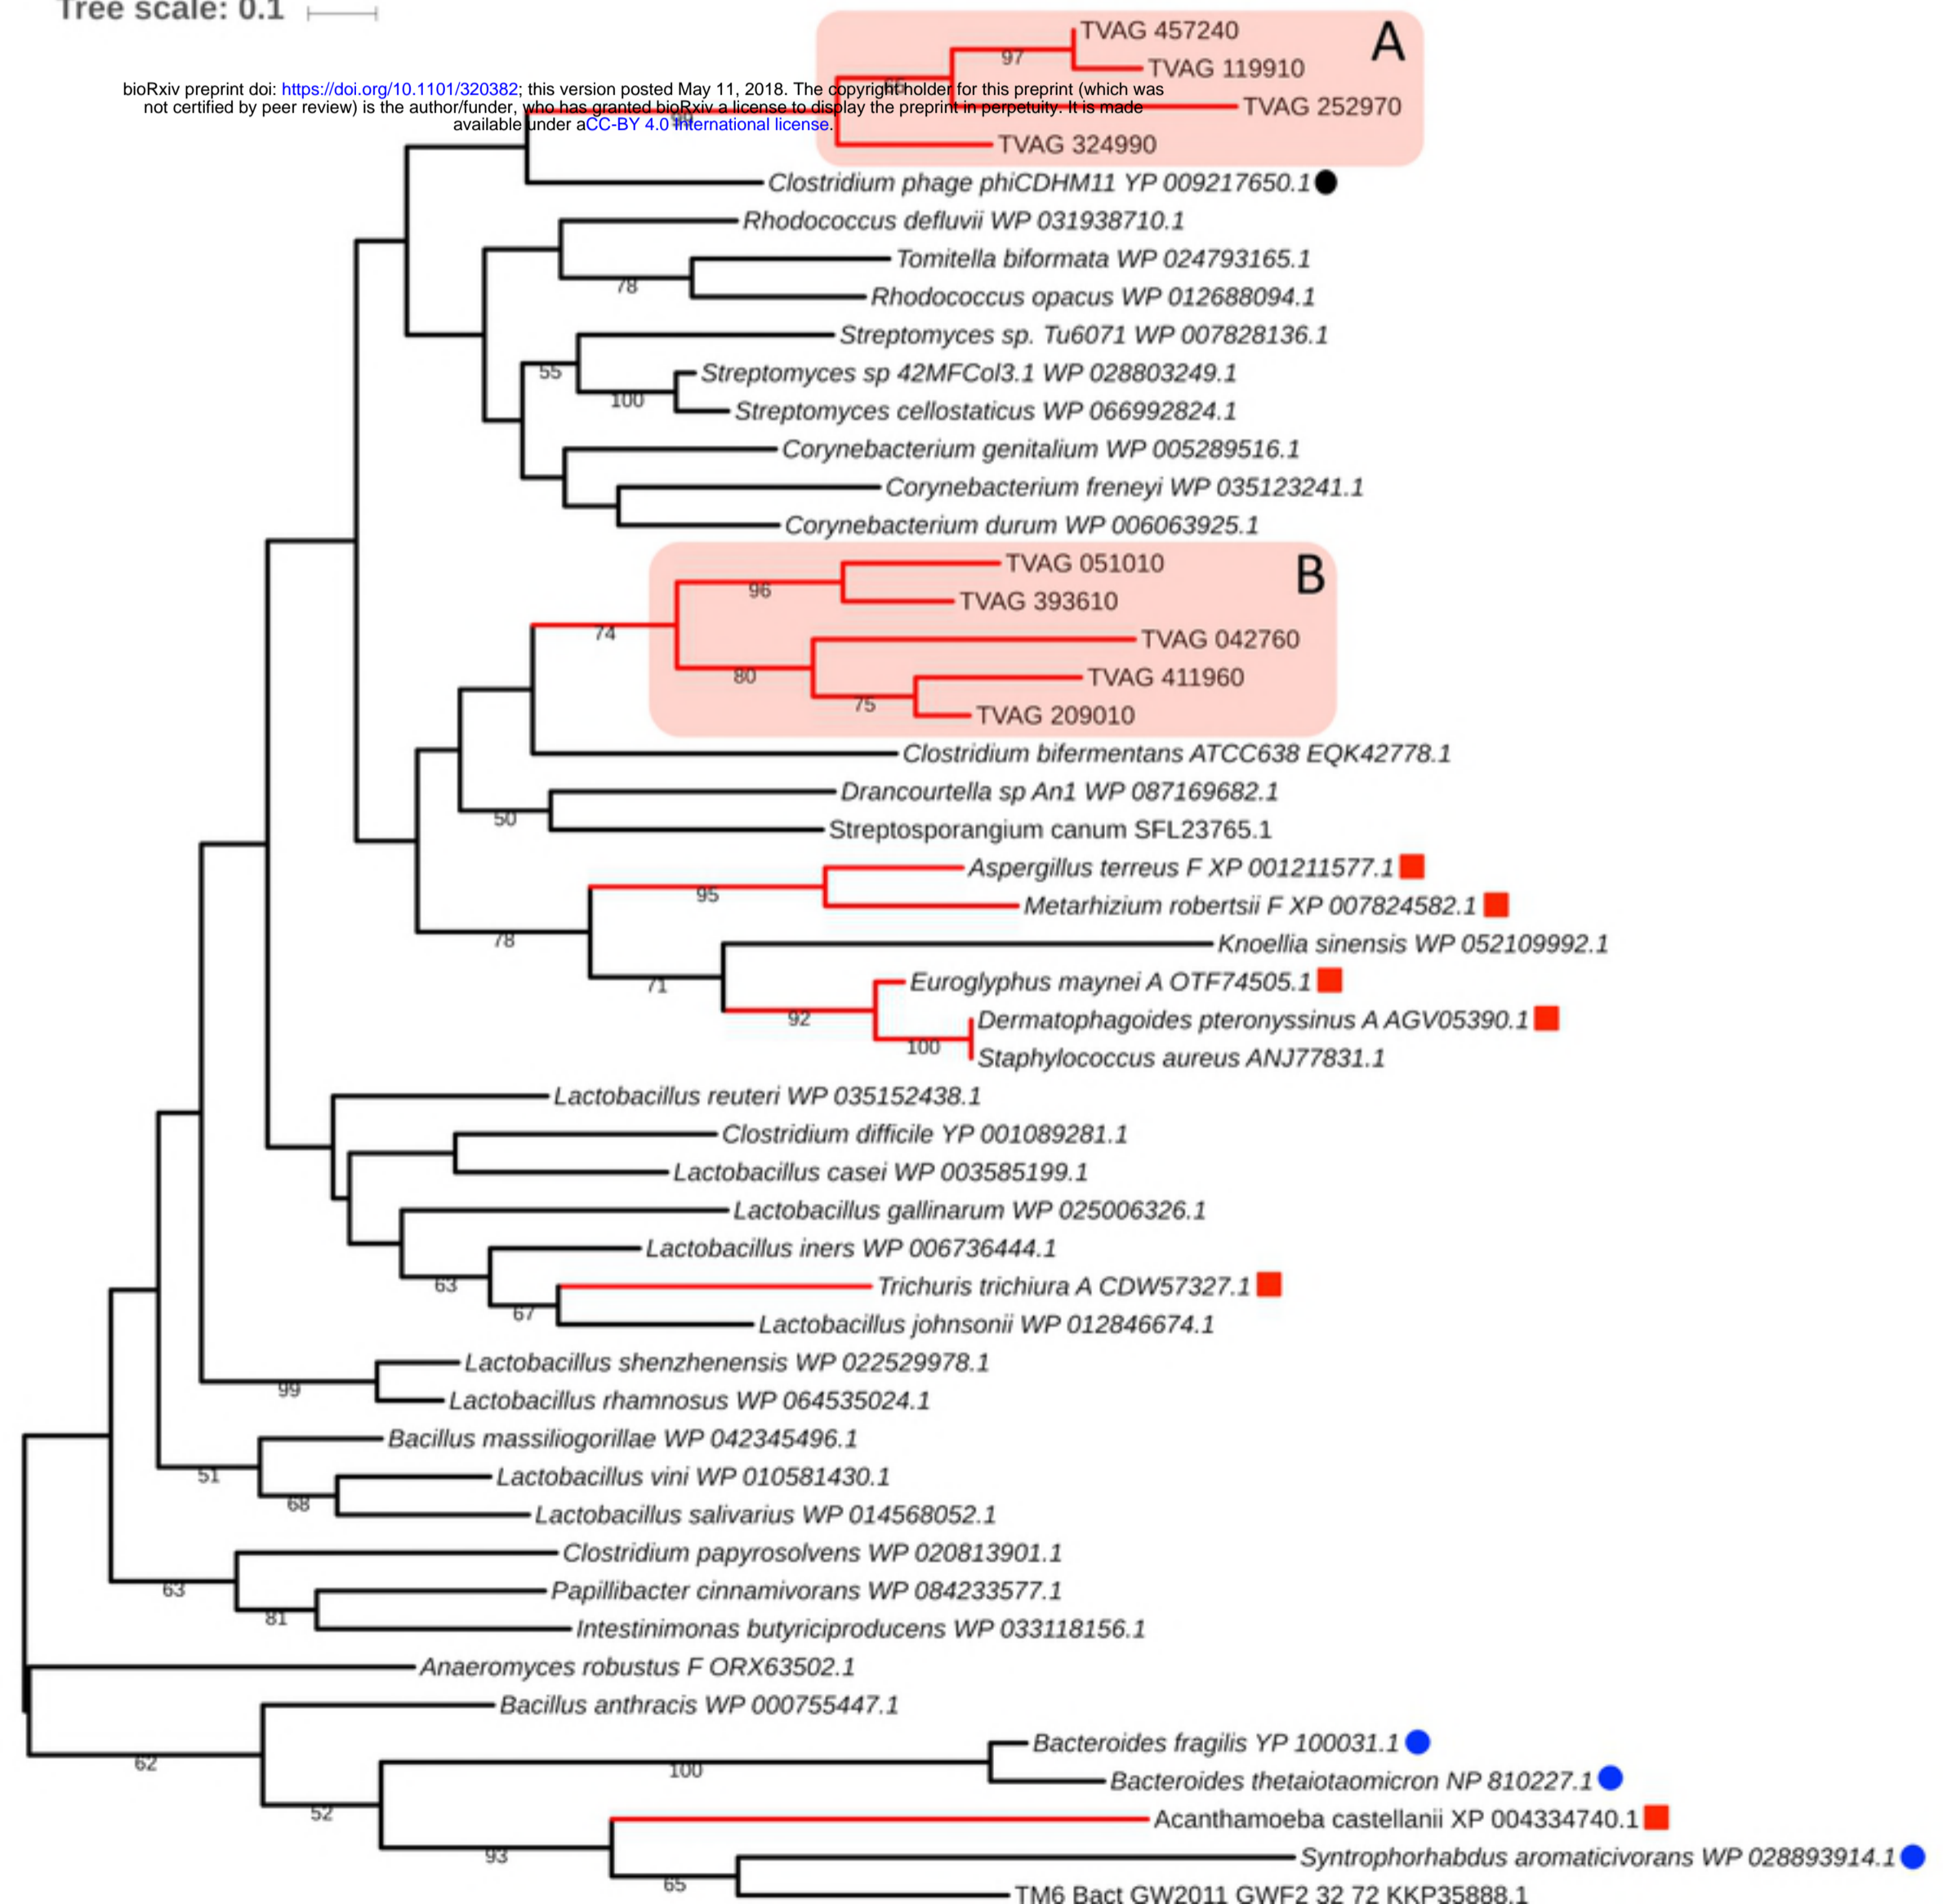

A

## NlpC domain

bioRxiv preprint doi: <https://doi.org/10.1101/320382>; this version posted May 11, 2018. The copyright holder for this preprint (which was not certified by peer review) is the author/funder, who has granted bioRxiv a license to display the preprint in perpetuity. It is made available under aCC-BY 4.0 International license.

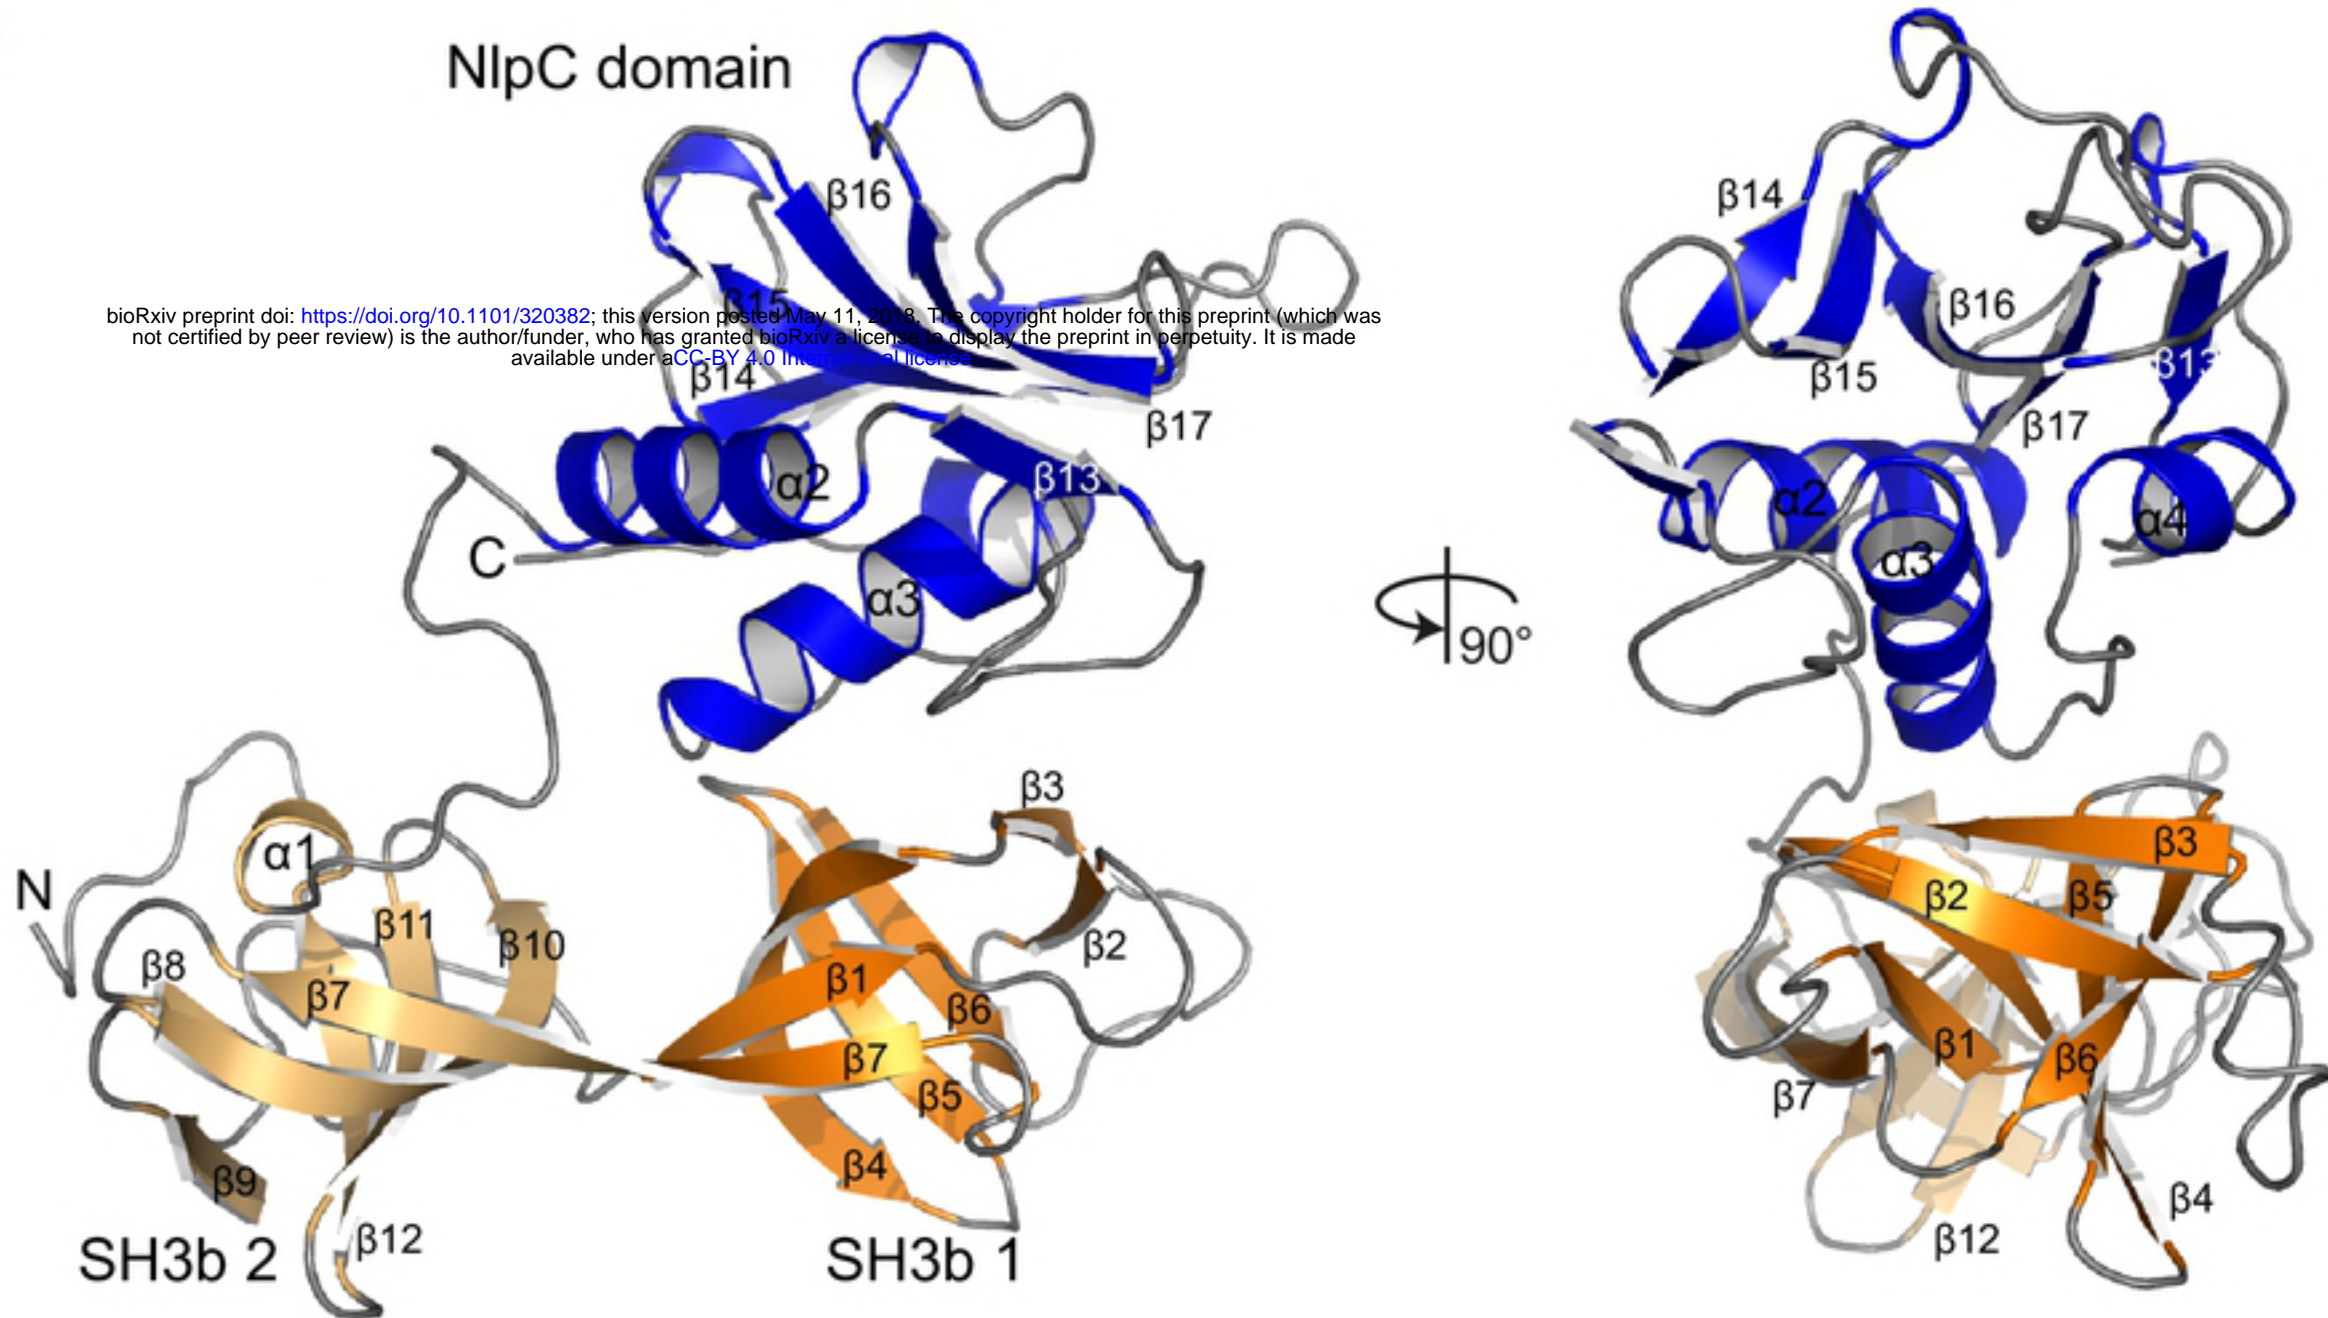

B

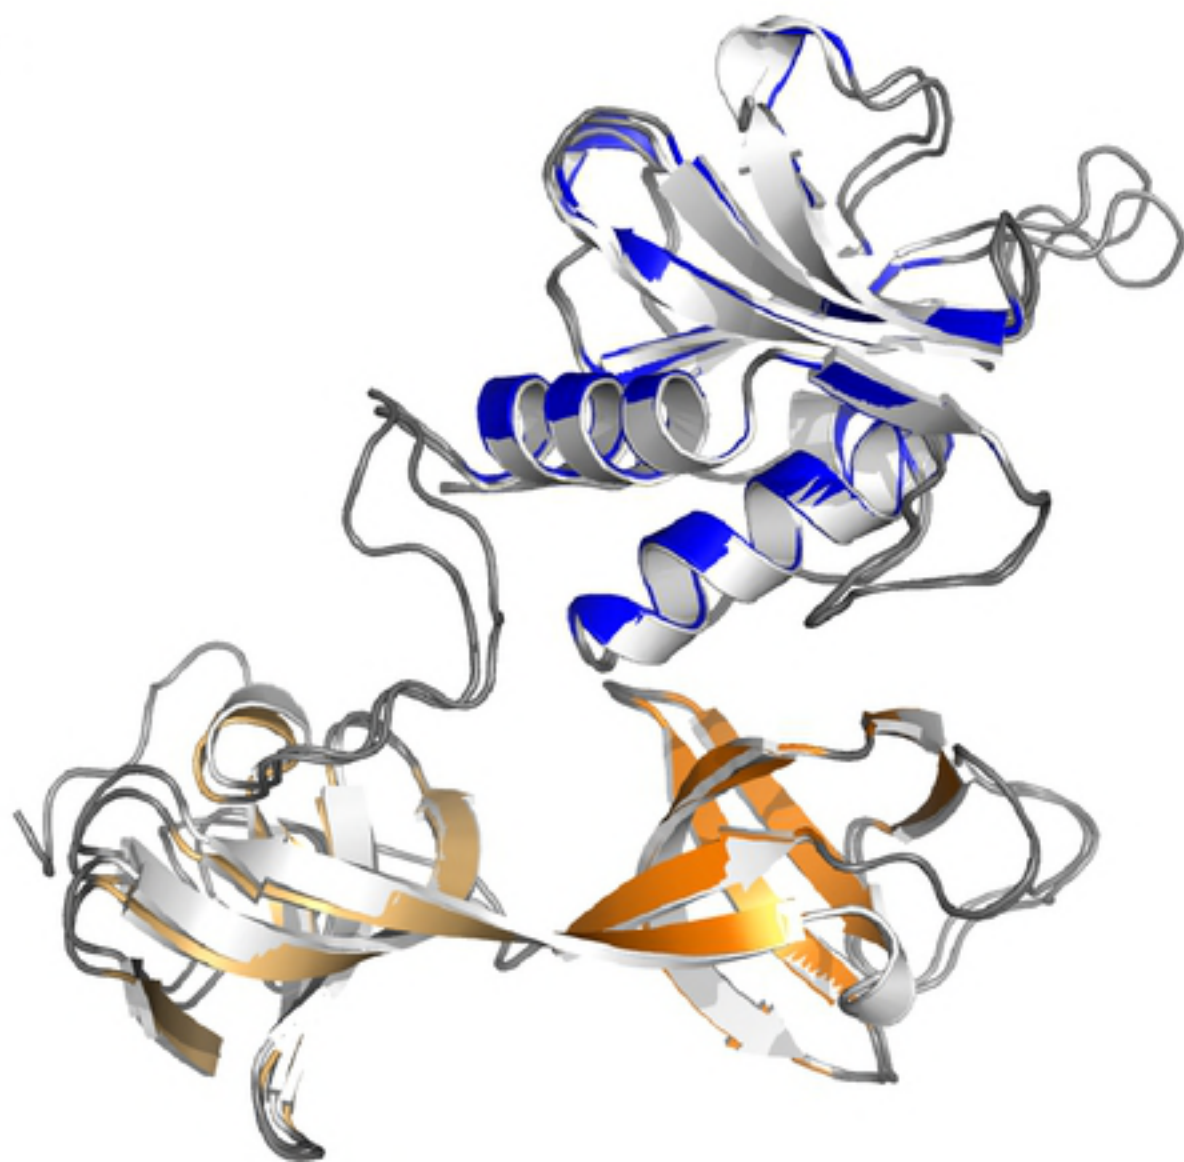

C

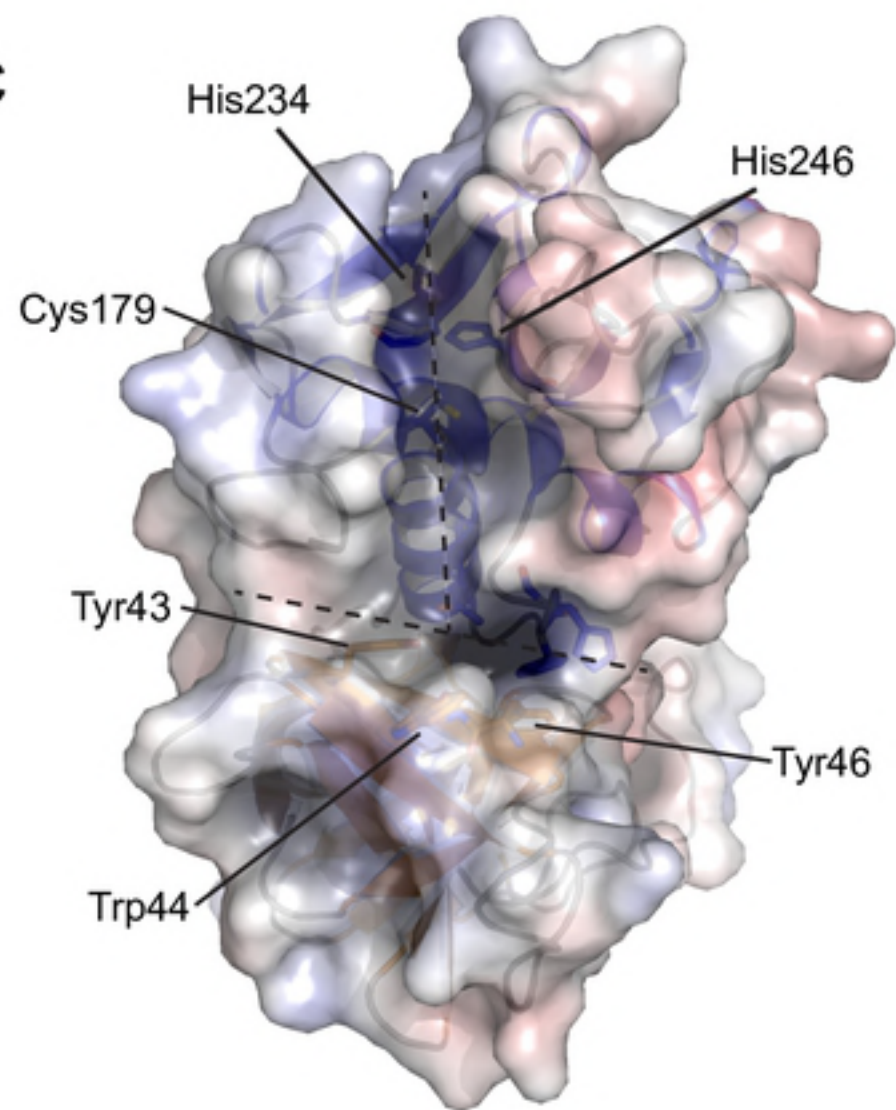



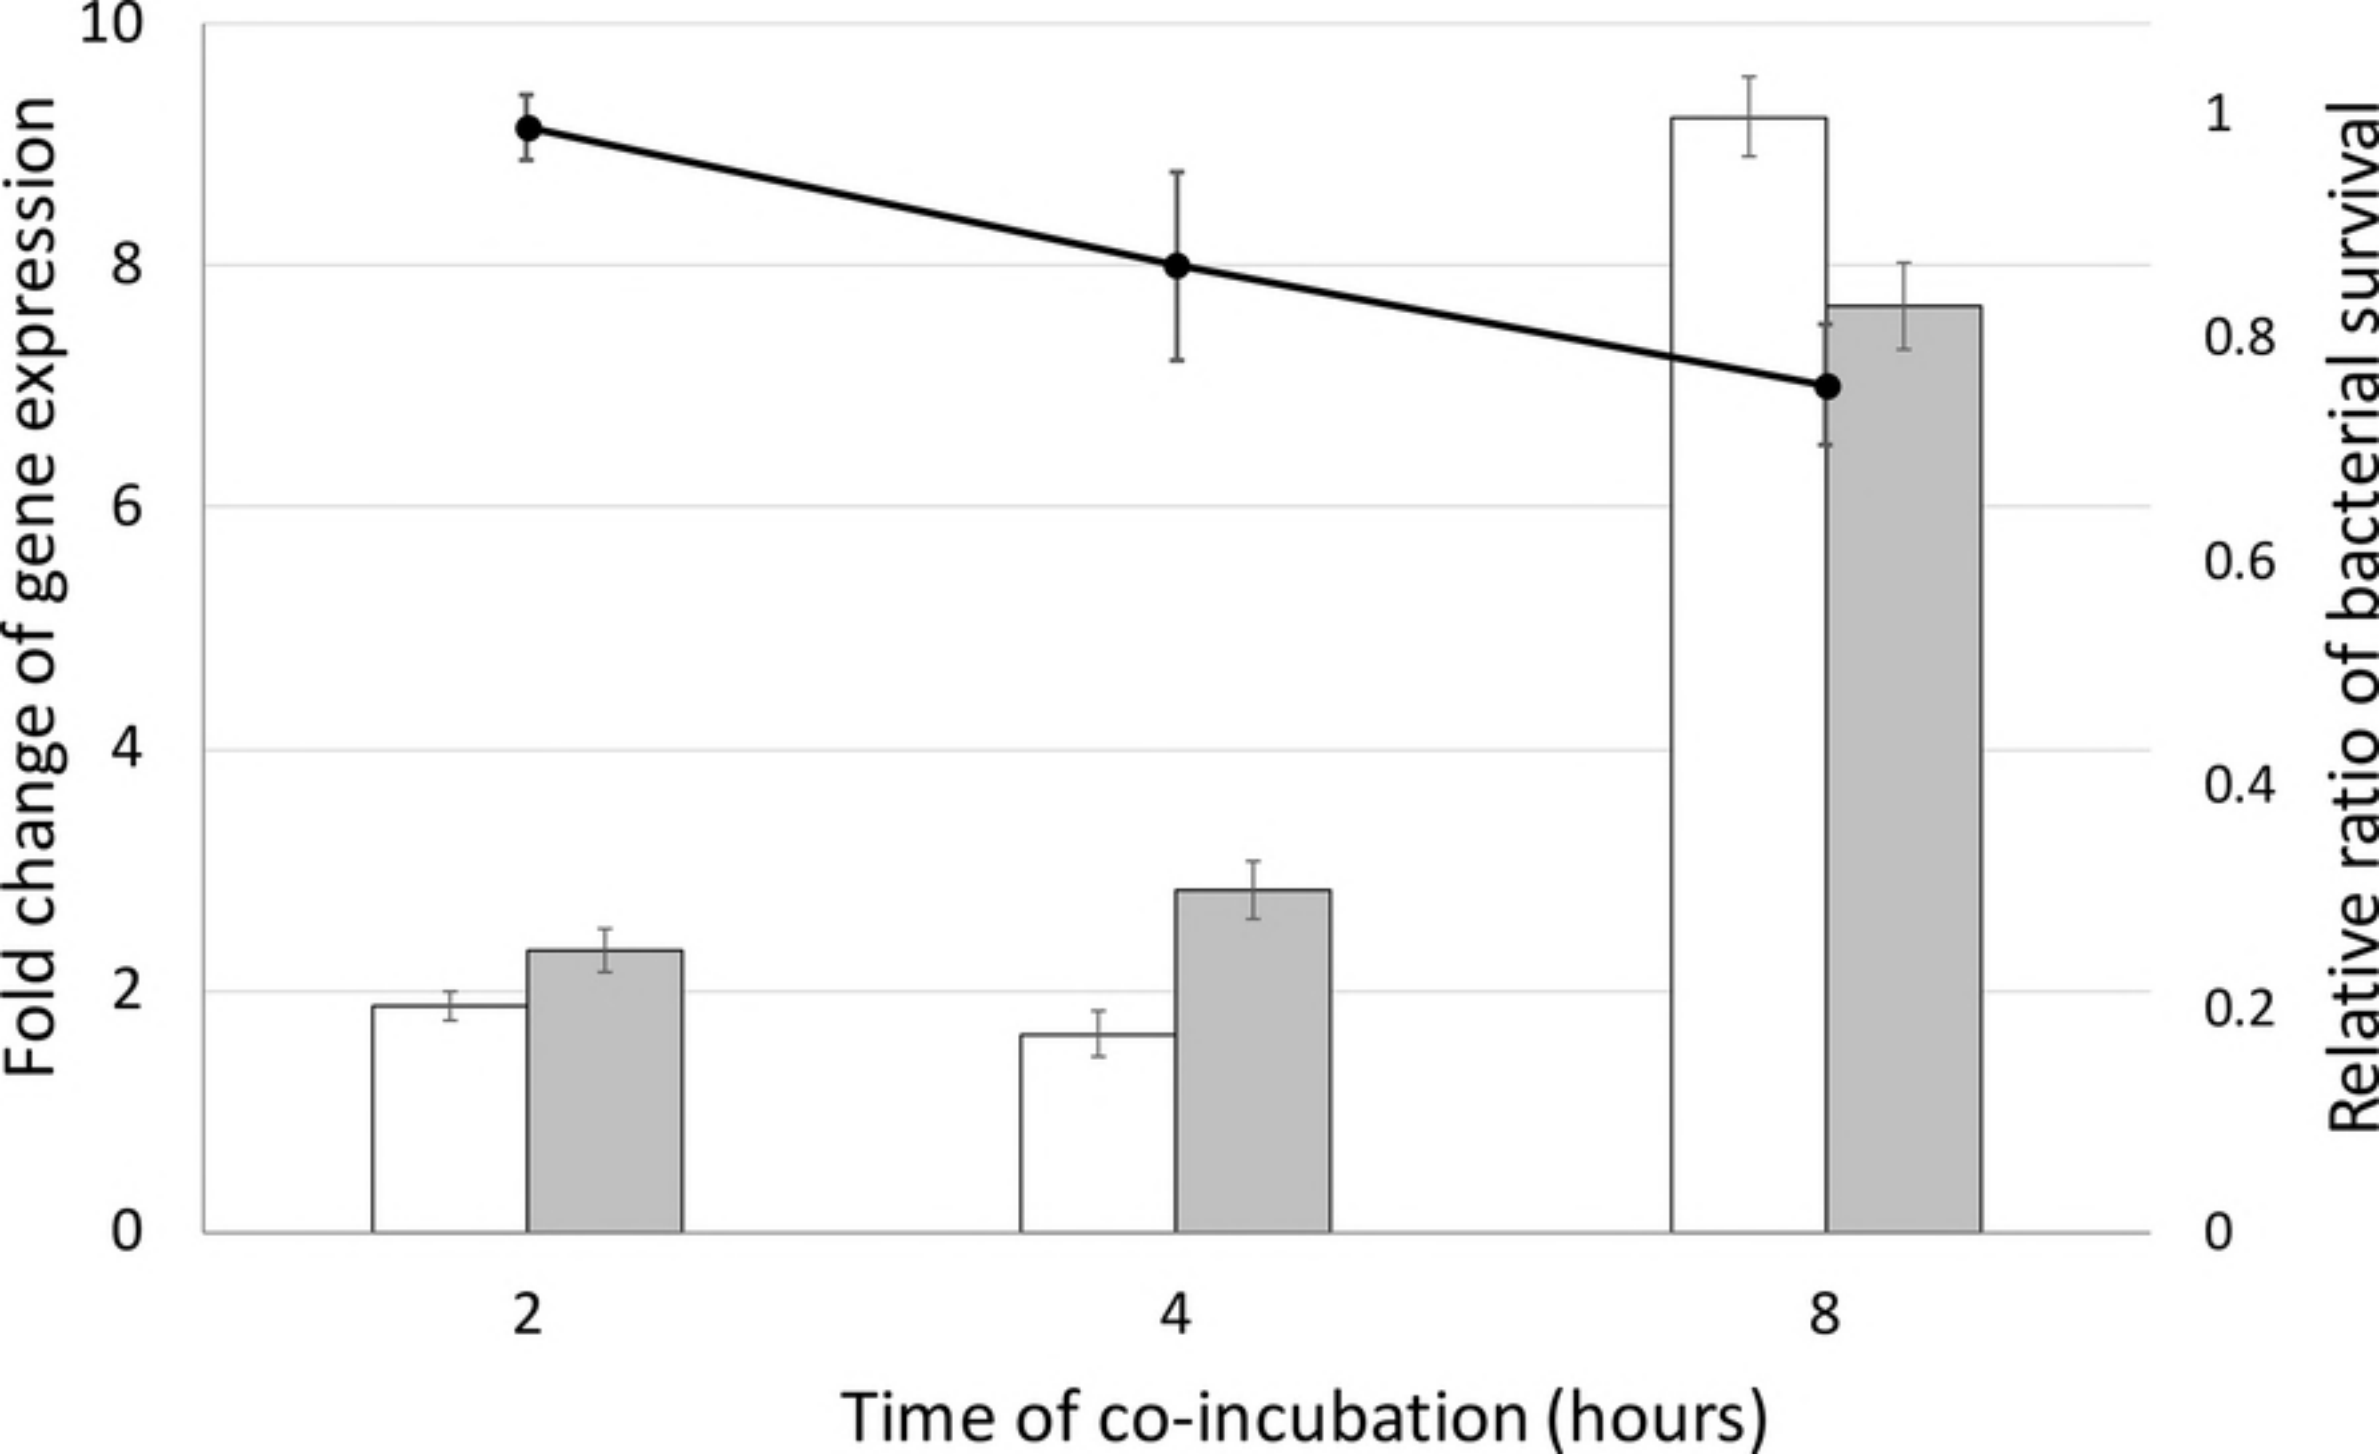

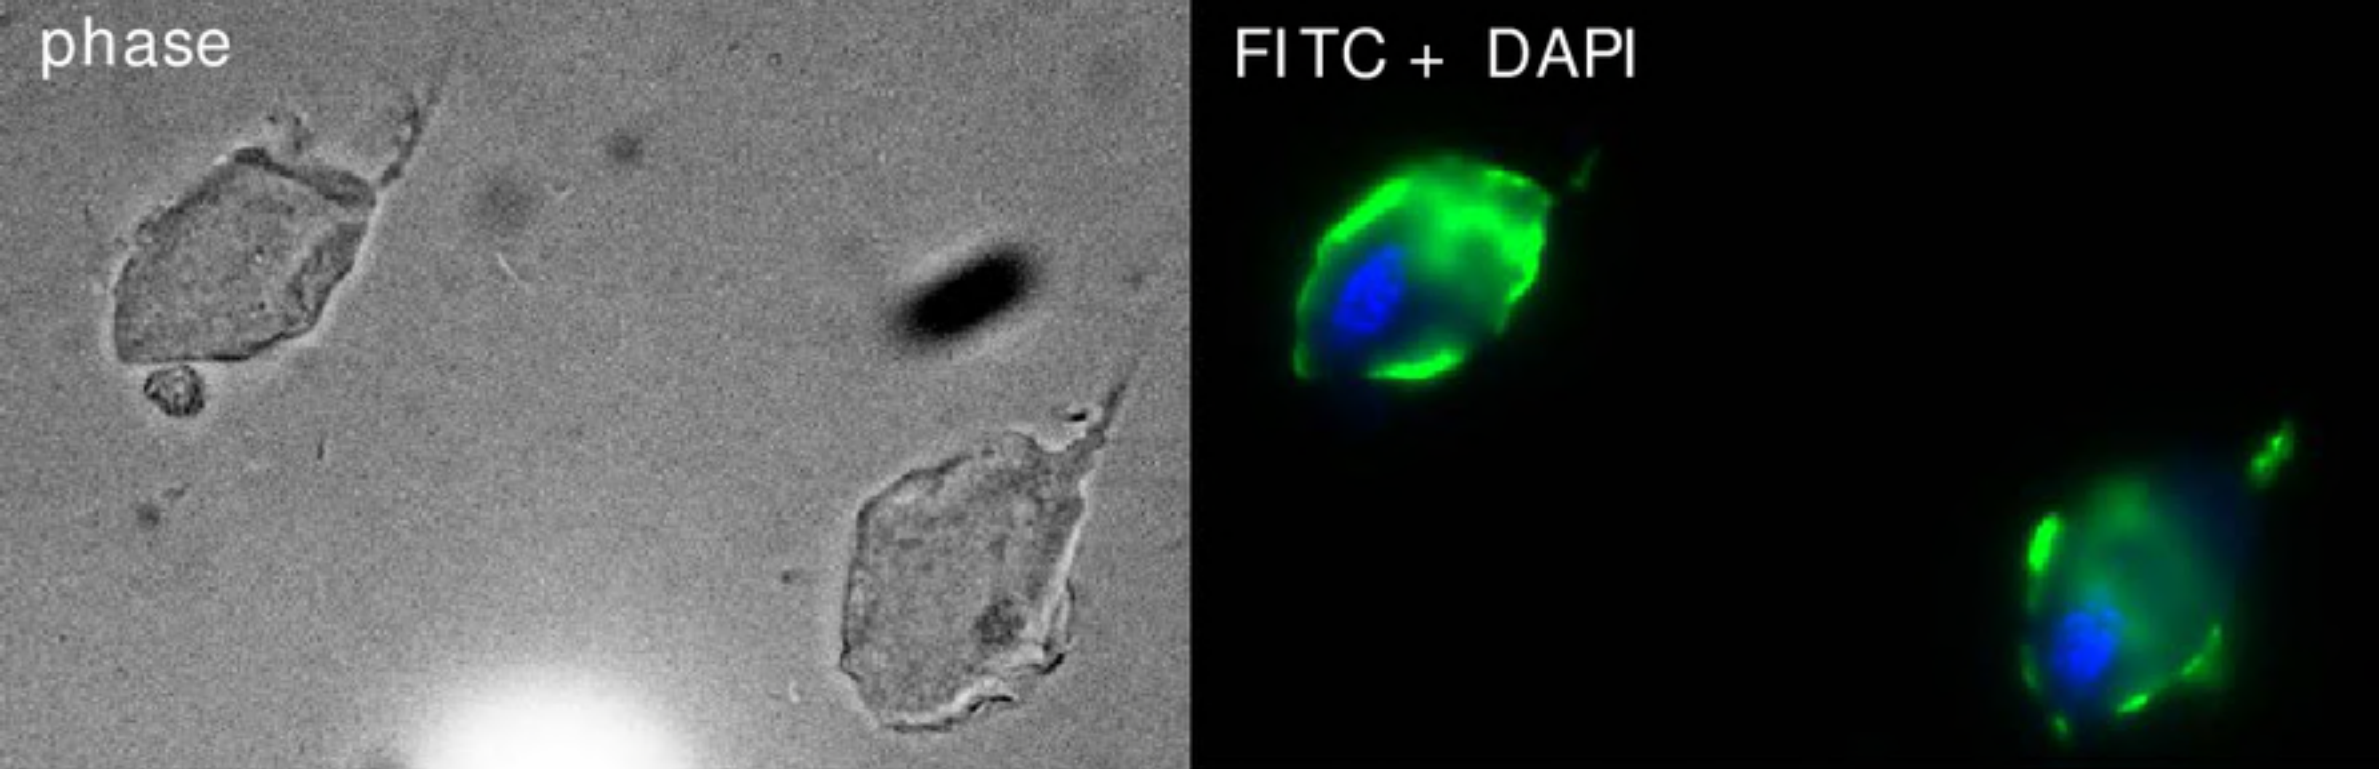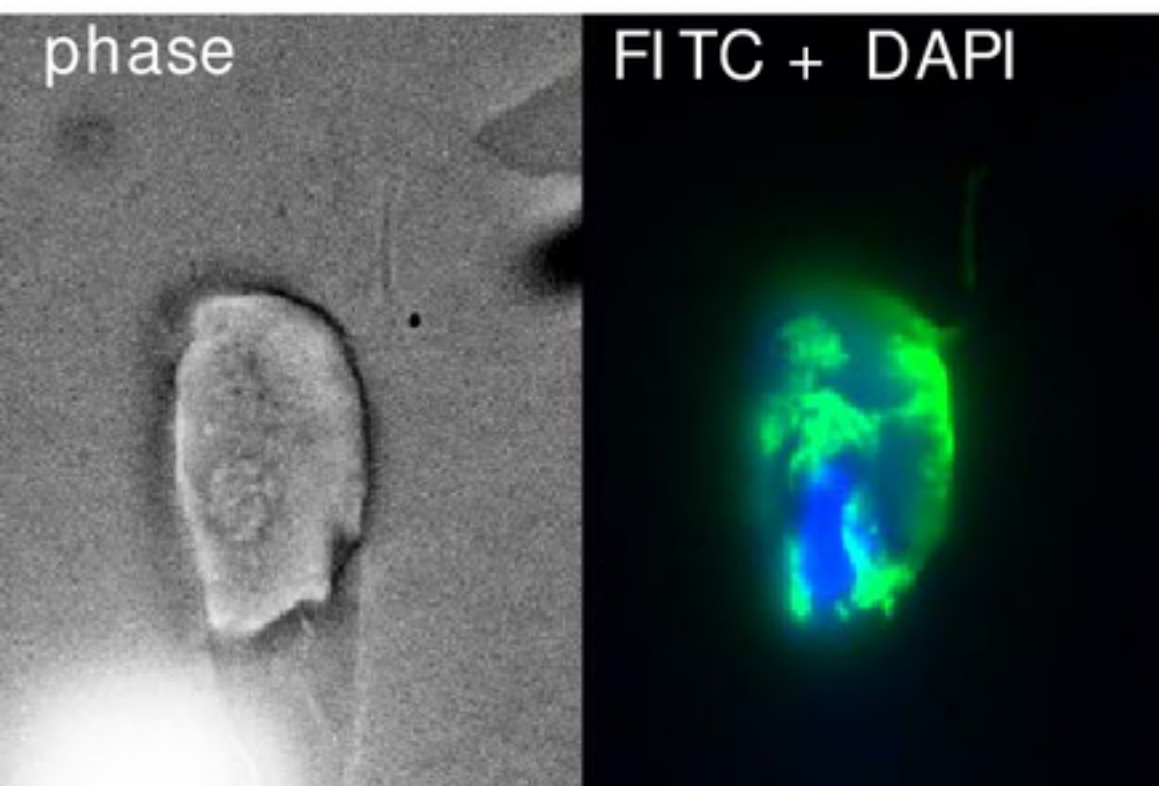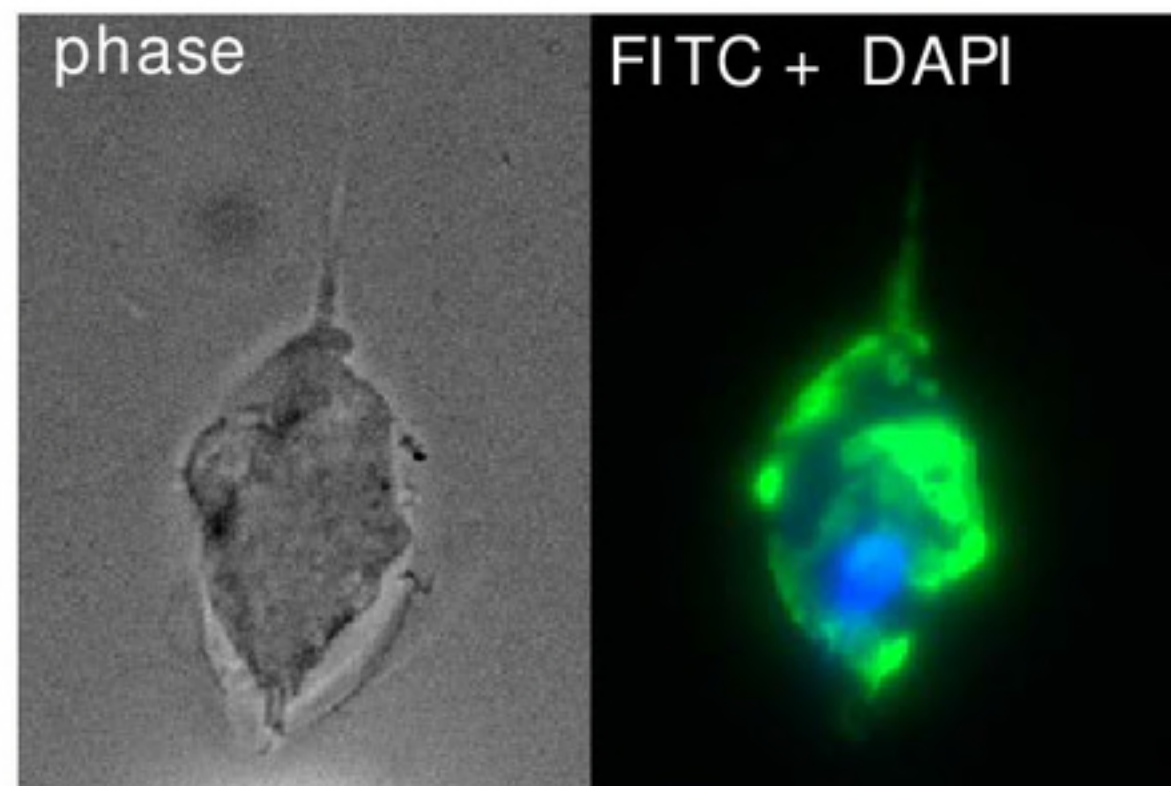

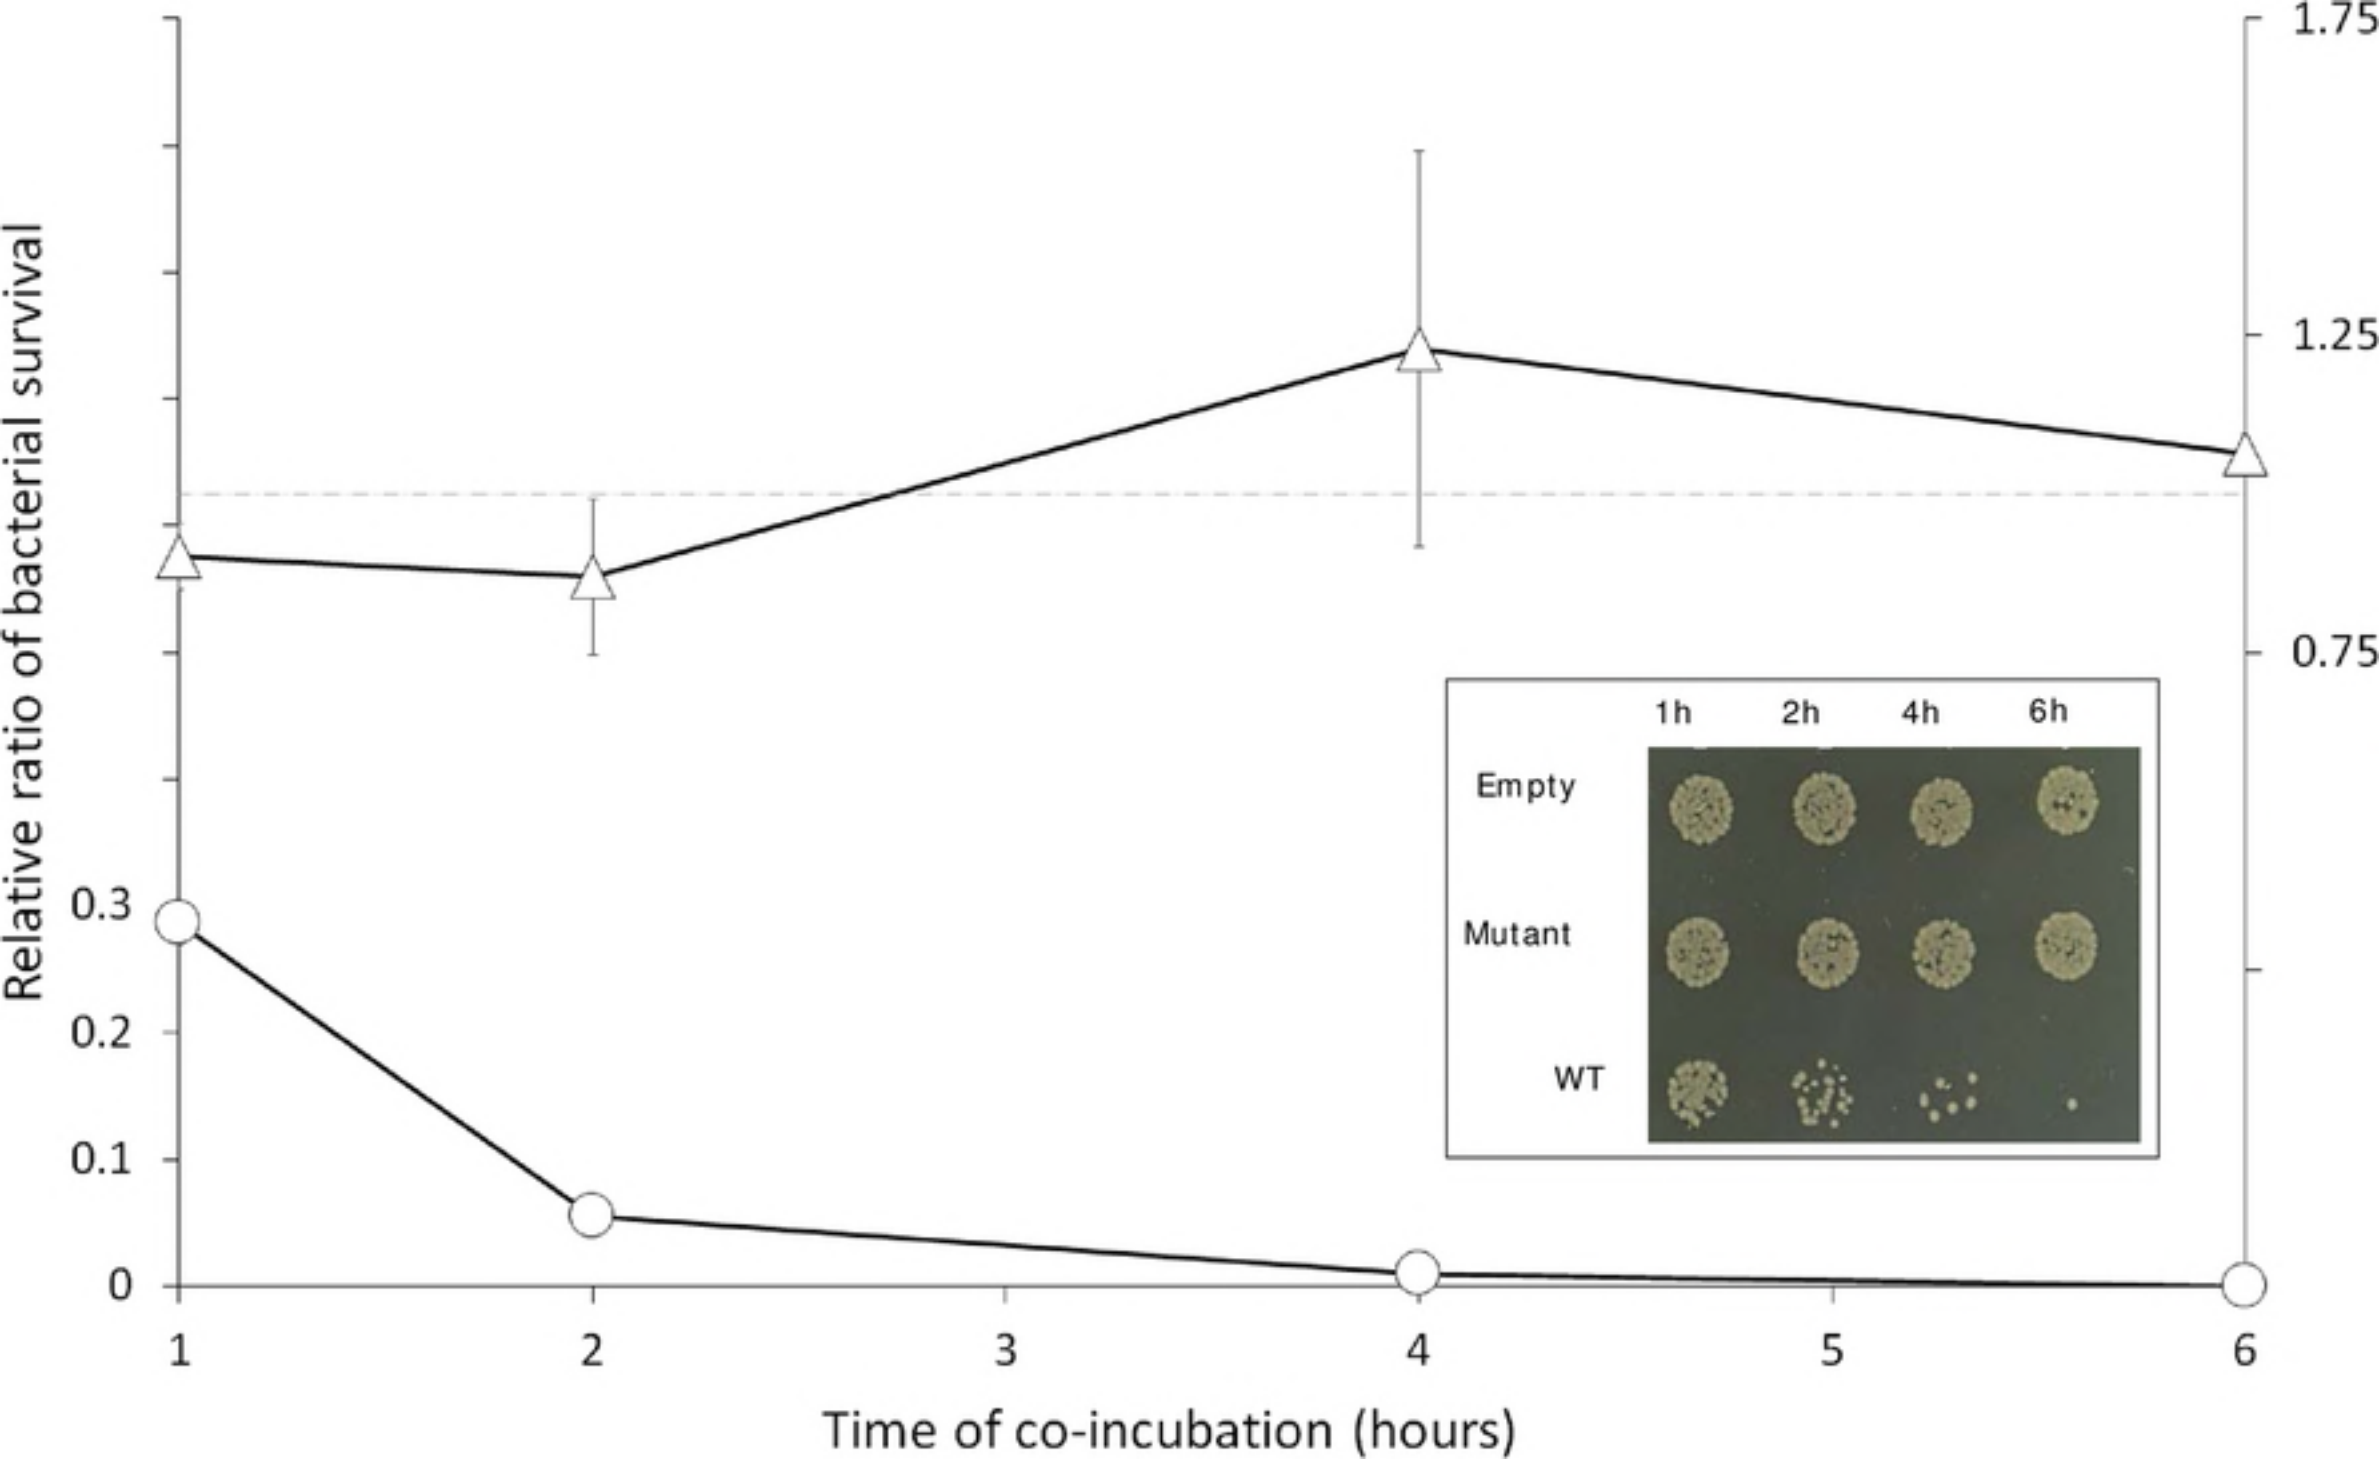

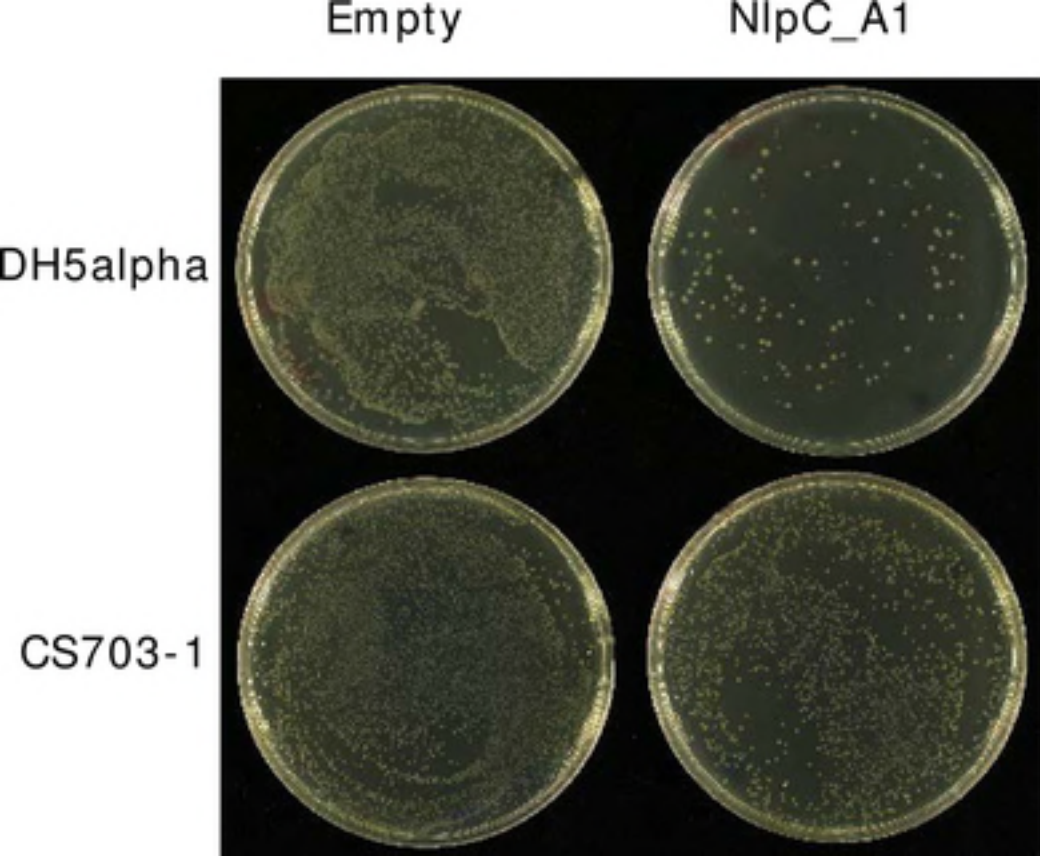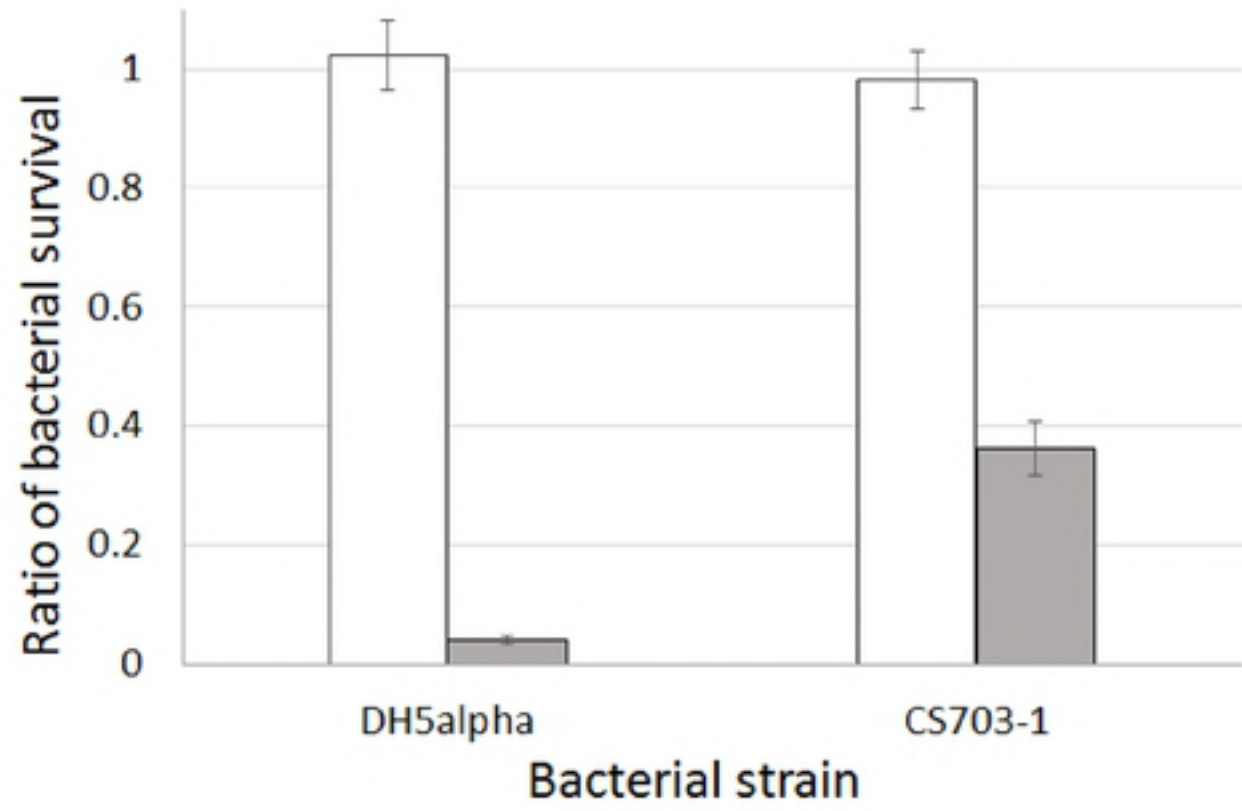

Source: https://www.biorxiv.org/content/10.1101/320382v1.full.pdf
